# Supplementary material for: Mechanistic insight into Pb2+ and Hg2+ ion sensing using cobalt-based coordination polymer in aqueous phase
Source: Royal Society of Chemistry journal article supplement (doi:10.1039/d3dt00479a), 2023-01-01
Supplement: d3dt00479a1.pdf [file d3dt00479a1.pdf]

## Supporting Information

### **Mechanistic Insight into Pb<sup>2+</sup> and Hg<sup>2+</sup> Ions Sensing using Cobalt-based Coordination Polymer in Aqueous Phase**

Akashdeep Nath,<sup>a</sup> Diti Vikram Gaikwad<sup>a</sup> and Sukhendu Mandal<sup>a\*</sup>

<sup>a</sup> School of Chemistry, Indian Institute of Science Education and Research Thiruvananthapuram, Thiruvananthapuram, Kerala-695551, India, E-mail: [sukhendu@iisertvm.ac.in](mailto:sukhendu@iisertvm.ac.in)

## Contents

| Sl. No. | Description                                                                                                           | Page No. |
|---------|-----------------------------------------------------------------------------------------------------------------------|----------|
| A       | Comparison table. Table S1. Literature of inorganic-organic hybrid materials-based Pb (II) sensors                    | S4       |
| B       | Experimental section                                                                                                  | S5-S6    |
| C       | Crystal Structure description                                                                                         | S7-S12   |
|         | Table S2. Crystallographic parameters of <b>1</b>                                                                     | S7       |
|         | Table S3. Selected bond lengths (Å) of <b>1</b>                                                                       | S8       |
|         | Table S4. Selected bond angles ( $^{\circ}$ ) of <b>1</b>                                                             | S8       |
|         | Topological analysis                                                                                                  | S9       |
|         | Crystal structures                                                                                                    | S10-S12  |
| D       | FT-IR spectra                                                                                                         | S13-S14  |
| E       | Powder XRD pattern                                                                                                    | S15      |
| F       | Thermogravimetric analysis                                                                                            | S16      |
| G       | Steady-state spectroscopy                                                                                             | S17-S22  |
|         | UV-Vis absorption spectra                                                                                             | S17-S19  |
|         | Emission spectra                                                                                                      | S20-S21  |
|         | Excitation spectra                                                                                                    | S22      |
| H       | Fluorescence lifetime decay profile of BTB and <b>1</b>                                                               | S23      |
|         | Table S5. Detail parameters of the fitted fluorescence decay plot of BTB in water                                     | S23      |
|         | Table S6. Detail parameters of the fitted fluorescence decay plot of <b>1</b> in water                                | S23      |
| I       | Stability test in water                                                                                               | S24      |
| J       | Faraday-Tyndall experiment and DLS study                                                                              | S25      |
| K       | Limit of detection calculation for Pb (II) ion                                                                        | S26      |
| L       | Recyclability tests                                                                                                   | S27-S28  |
| M       | Sensing at different pH                                                                                               | S29-S30  |
| N       | Table S7. Pb (II) spiking from natural water resources                                                                | S31      |
| O       | Absorption spectra of <b>1</b> with different Pb (II) ion concentrations                                              | S32      |
| P       | Table S8. Detail parameters of the fitted fluorescence decay plot of <b>1</b> after adding PbCl <sub>2</sub> solution | S33      |
| Q       | Stern-Volmer plots                                                                                                    | S34      |
| R       | Host-guest interaction                                                                                                | S35-S39  |
|         | Table S9. Stabilization energy of optimized PbCl <sub>2</sub> on BTB molecule                                         | S40      |
| S       | Limit of detection calculation for Hg (II) ion                                                                        | S41      |
| T       | Anti-inference ability of <b>1</b> for Hg (II) sensing and comparison                                                 | S42      |
| U       | Absorption spectra of <b>1</b> with different Hg (II) ion concentrations                                              | S43      |

|   |                                                                                                                             |         |
|---|-----------------------------------------------------------------------------------------------------------------------------|---------|
| V | XPS spectra                                                                                                                 | S44-S46 |
|   | XPS spectra of pristine <b>1</b>                                                                                            | S44     |
|   | XPS spectra of pristine <b>1</b> after addition of HgCl <sub>2</sub> aqueous solution                                       | S45     |
|   | XPS spectra of pristine <b>1</b> after addition of PbCl <sub>2</sub> aqueous solution                                       | S46     |
| W | Lifetime decay profile of <b>1</b> after addition of HgCl <sub>2</sub> aqueous solution                                     | S47     |
|   | Table S10. Detail parameters of the fitted fluorescence decay plot of <b>1</b> after addition of HgCl <sub>2</sub> solution | S47     |
| X | References                                                                                                                  | S48     |

## A. Comparison table

**Table S1.** Literature of inorganic-organic hybrid materials-based Pb (II) sensors.

| Sl. No. | Materials                                                                                          | Detection limit (M)            | K <sub>sv</sub> (M <sup>-1</sup> ) | Interaction type | Turn-on/off | Ref.      |
|---------|----------------------------------------------------------------------------------------------------|--------------------------------|------------------------------------|------------------|-------------|-----------|
| 1       | [Co(BTB)( 4,4'-azopyridine)].H <sub>2</sub> O.DMF                                                  | 7.08(±0.08) × 10 <sup>-8</sup> | 2.2 × 10 <sup>4</sup>              | Excited-state    | Turn-off    | This Work |
| 2       | [Eu <sub>2</sub> (FDC) <sub>3</sub> DMA(H <sub>2</sub> O) <sub>3</sub> ].DMA.4.5 H <sub>2</sub> O  | 8.2 × 10 <sup>-6</sup>         | 2.97 × 10 <sup>4</sup>             | Excited-state    | Turn-on     | S1        |
| 3       | CDs/QDs@ZIF-8                                                                                      | 2.4 × 10 <sup>-9</sup>         | 8.46 × 10 <sup>4</sup>             | Excited-state    | Turn-off    | S2        |
| 4       | [Tb(ppda)(npdc) <sub>0.5</sub> (H <sub>2</sub> O) <sub>2</sub> ] <sub>n</sub>                      | 9.44 × 10 <sup>-5</sup>        | 1.05 × 10 <sup>5</sup>             | Excited-state    | Turn-on     | S3        |
| 5       | [Tb(L)(H <sub>2</sub> O) <sub>5</sub> ] <sub>n</sub><br>(H <sub>2</sub> L= 3,5-dicarboxyphenolate) | 3.4 × 10 <sup>-7</sup>         | 1.75 × 10 <sup>4</sup>             | Ground-state     | Turn-off    | S4        |
| 6       | MOF-5-NH <sub>2</sub>                                                                              | 2.5 × 10 <sup>-7</sup>         | ~2.8 × 10 <sup>2</sup>             | Ground-state     | Turn-off    | S5        |
| 7       | Cd(II)-MOF                                                                                         | 1.9 × 10 <sup>-9</sup>         | 2.4 × 10 <sup>4</sup>              | Ground-state     | Turn-off    | S6        |
| 8       | Zn(II)-MOF                                                                                         | 8 × 10 <sup>-7</sup>           | 1.18 × 10 <sup>4</sup>             | Ground-state     | Turn-off    | S7        |
| 9       | MOF-5                                                                                              | 2 × 10 <sup>-9</sup>           | -                                  | Ground-state     | Turn-on     | S8        |
| 10      | [Zn(Nptp)(HBTC)] <sub>n</sub>                                                                      | -                              | 3.2 × 10 <sup>3</sup>              | Ground-state     | Turn-off    | S9        |
| 11      | In-MOF                                                                                             | 3.14 × 10 <sup>-8</sup>        | 9.78 × 10 <sup>3</sup>             | Ground-state     | Turn-off    | S10       |

## B. EXPERIMENTAL SECTION

**Chemicals.** Cobalt chloride (CoCl<sub>2</sub>), 1,3,5-Tris(4-carboxyphenyl) benzene, 4,4'-azopyridine, KCl, CaCl<sub>2</sub>, SrCl<sub>2</sub>, MgCl<sub>2</sub>, CuCl<sub>2</sub>, ZnCl<sub>2</sub>, MnCl<sub>2</sub>, CoCl<sub>2</sub> were procured from Sigma-Aldrich. LiCl, NaCl, BaCl<sub>2</sub>, NiCl<sub>2</sub>, HgCl<sub>2</sub>, and PbCl<sub>2</sub> were bought from Finar Chemicals, Merck, SRL Pvt. Ltd., Alfa Aesar, and Spectrochem Pvt. Ltd., respectively. (**Caution: Lead chloride and mercury chloride are highly toxic. High precaution and lab safety should be taken care while performing all the experiments with Pb<sup>2+</sup> and Hg<sup>2+</sup>. Being potentially dangerous to the environment, all the waste products after experiments should be treated with proper protocol**). p-Terphenyl was purchased from TCI Chemicals. Anhydrous N, N'-dimethylformamide (DMF), and HPLC cyclohexane were acquired from Spectrochem Pvt. Ltd. We used all the chemicals without any further purification. Double distilled water was used wherever required throughout the project.

**Synthesis of 1 [Co(BTB)(4,4'-azopyridine)].(DMF)(H<sub>2</sub>O).** 0.25 mmol CoCl<sub>2</sub>, 0.05 mmol 1,3,5-Tris(4-carboxyphenyl) benzene, 0.1 mmol 4,4'-azopyridine were measured in a 20 mL glass vial and dissolved with 7 mL H<sub>2</sub>O, followed by 3 mL DMF and subjected to sonication for 1 h. The resulting solution mixture was kept in a 100 °C hot air oven for 2 days and allowed to cool down normally to room temperature. Orange-coloured flake-like crystals were formed, which were washed 3-4 times with DMF, dried under vacuum, and stored in an ambient condition for further experiments.

**Single Crystal X-ray Diffraction.** A good quality single-crystal was mounted at 170 K on a Rigaku Oxford Diffraction XtaLAB Synergy-S diffractometer combined with a HyPix-6000HE Hybrid Photon Counting (HPC) detector. We used Cu K $\alpha$  ( $\lambda = 1.54184 \text{ \AA}$ ) from PhotonJet micro-focus sealed X-ray Source. CrystAlisPro software suite was utilized for data processing.<sup>[S11]</sup> The computing structure was refined with full-matrix least-squares techniques using SHELXL 2018/3 (Sheldrick, 2015).<sup>[S12]</sup> All the hydrogens were positioned geometrically, whereas non-hydrogens atoms were refined anisotropically in OLEX2.<sup>[S13]</sup> Thermal constraints were used for disorderd DMF molecule.

**General instrumentations.** The powder X-ray diffraction ( $5^{\circ} < 2\theta < 50^{\circ}$ ) was carried out in Bruker D8 Advance X-ray diffractometer. The steady-state spectroscopy was performed on UV-2600 SHIMADZU UV-Vis/NIR spectrometer and Horiba Jobin Yvon Fluorolog-3 spectrofluorometer for absorption and emission, respectively. Thermal stability was obtained in a SDT Q600 (Shimadzu) analyzer at a heating rate of 10 °C/min from room temperature to 600 °C under a constant N<sub>2</sub> flow. Dynamic light scattering experiment was carried out in a Malvern Zetasizer Nano-ZS analyzer. The FT-IR spectra were measured in a SHIMADZU IRPrestige-21 spectrometer using KBr pellet.

**Quantum yield calculation.** We used p-terphenyl (in cyclohexane) as a reference for quantum yield measurement. We excited the BTB linker, **1**, and reference at 290 nm by keeping the individual absorbance similar (0.03-0.04). The relative quantum yield ( $\phi_s$ ) was measured after integrating the area of the emission spectra using the following equation,

$$\phi_s = \phi_R \left( \frac{I_s}{I_R} \right) \left( \frac{A_R}{A_s} \right) \left( \frac{n_s}{n_R} \right)^2 \quad \dots\dots\dots (S1)$$

where,  $I$  is an integrated area of the emission spectrum,  $A$  denotes absorbance,  $n$  is the refractive index of the solvent used (water for linkers and **1**, cyclohexane for p-terphenyl).<sup>[S14]</sup>  $\phi_R$  is 0.93 when excited at 290 nm in cyclohexane.<sup>[S15]</sup>

**Time-resolved fluorescence spectroscopy.** The lifetime decay profile was measured using a 310 nm laser diode excitation source using time-correlated single-photon counting (TCSPC) technique on a

Horiba Jobin Yvon-IBH time-resolved fluorimeter, containing Hamamatsu R3809U-50 microchannel plate detector (instrument response time is 38.6 ps), coupled to a monochromator (5000M) and TCSPC electronics (Data station Hub including Hub-NL, NanoLED controller). DAS6.3 fluorescence decay analysis software was used to fit the obtained data.

### Fluorescence sensing.

**Probe solution preparation.** 1 mg of **1** was dissolved in 1.7 mL distilled water and sonicated for 30 min, followed by centrifugation at 10000 rpm for 6 min. 1.5 mL of the supernatant was taken from the solution and added to 1.5 mL of distilled water, which was used for further sensing studies.

**Metal ion solutions preparation.** All the metal ion solutions were prepared in an aqueous medium. We prepared  $10^{-2}$  M  $\text{PbCl}_2$  as a primary solution; other working  $\text{PbCl}_2$  solutions were made by diluting it with distilled water. The final concentration of metal ion was calculated when dissolved it in a quartz cuvette containing 3 mL of **1** solution. We used the same concentration of metal ions ( $10^{-5}$  M) for comparative studies.

**Limit of Detection (LOD).** The fluorescence quenching was plotted with different Pb (II) ion concentrations and fitted linearly. The obtained slope from the linear fit was used to calculate the LOD value employing the following equations,

$$\text{Limit of detection} = \frac{3\sigma}{\text{Slope}} \quad \dots\dots\dots (\text{S2})$$

$$\sigma = 100 \times (I_{SE}/I_0) \quad \dots\dots\dots (\text{S3})$$

where,  $I_{SE}$  denotes standard error in emission measurement which is calculated from baseline measurement monitored at 357 nm (10 times),  $I$  is pristine emission intensity of the **1**.<sup>[S16]</sup>

**Recyclability test.** The material was washed thoroughly in water after use for Pb (II) sensing and centrifuged to discard the water. This process was repeated four times, followed by drying under a vacuum before reusing for the next cycle.

### Theoretical calculation.

A density functional theory was carried out to optimize the ground-state and excited-state geometry of BTB molecule along with frequency calculation using a polarized double-zeta basis set (cc-pVDZ) with long-range-corrected hybrid functional ( $\omega$ b97xd).<sup>[S17]</sup> The Los Alamos effective core potential (ECP) LanL2-DZ for Pb and split valence cc-pVDZ basis set for Cl atom was used with  $\omega$ b97xd functional for geometry optimization of  $\text{PbCl}_2$  molecule.<sup>[S18-19]</sup> The time-dependent DFT calculation was carried out with the same level of theory using a polarizable continuum model (PCM) for an aqueous medium.<sup>[S20]</sup> We employed the following equation to calculate the stabilization energy ( $\Delta E$ ),

$$\Delta E = E_{\text{BTB-PbCl}_2} - (E_{\text{BTB}} + E_{\text{PbCl}_2}) \quad \dots\dots\dots (\text{S4})$$

Gaussian 16 program package was used for all the calculations.<sup>[S21]</sup>

## C. Crystal Structure description

**Table S2.** Crystallographic parameters of **1**.

|                                                                                                                                                                                                                         |                                                                 |
|-------------------------------------------------------------------------------------------------------------------------------------------------------------------------------------------------------------------------|-----------------------------------------------------------------|
| Parameters                                                                                                                                                                                                              |                                                                 |
| CCDC number                                                                                                                                                                                                             | 2238686                                                         |
| Empirical formula                                                                                                                                                                                                       | C <sub>39</sub> H <sub>26</sub> CoN <sub>5</sub> O <sub>8</sub> |
| Formula weight                                                                                                                                                                                                          | 751.58                                                          |
| Crystal System                                                                                                                                                                                                          | Triclinic                                                       |
| Space Group                                                                                                                                                                                                             | <i>P</i> -1 (No. 2)                                             |
| <i>a</i> (Å)                                                                                                                                                                                                            | 9.4934 (4)                                                      |
| <i>b</i> (Å)                                                                                                                                                                                                            | 12.7660 (4)                                                     |
| <i>c</i> (Å)                                                                                                                                                                                                            | 15.1031 (6)                                                     |
| α (°)                                                                                                                                                                                                                   | 75.989 (3)                                                      |
| β (°)                                                                                                                                                                                                                   | 80.082 (3)                                                      |
| γ (°)                                                                                                                                                                                                                   | 71.663 (3)                                                      |
| Volume (Å <sup>3</sup> )                                                                                                                                                                                                | 1676.56 (12)                                                    |
| Z                                                                                                                                                                                                                       | 2                                                               |
| Calculated density (mg/m <sup>3</sup> )                                                                                                                                                                                 | 1.489                                                           |
| Absorption coefficient (mm <sup>-1</sup> )                                                                                                                                                                              | 4.559                                                           |
| θ range (°)                                                                                                                                                                                                             | 3.032 to 67.051                                                 |
| Reflections collected                                                                                                                                                                                                   | 17702                                                           |
| Unique reflections                                                                                                                                                                                                      | 5912                                                            |
| Number of parameters                                                                                                                                                                                                    | 482                                                             |
| Goodness-of-fit on F <sup>2</sup>                                                                                                                                                                                       | 1.062                                                           |
| Final R indices [ <i>I</i> > 2σ( <i>I</i> )]                                                                                                                                                                            | R <sub>1</sub> = 0.0622, wR <sub>2</sub> = 0.1685               |
| R indices (all data)                                                                                                                                                                                                    | R <sub>1</sub> = 0.0680, wR <sub>2</sub> = 0.1728               |
| $R_1 = \sum   F_0  -  F_c   / \sum  F_0 ; wR_2 = \{[w(F_0^2 - F_c^2)^2] / [w(F_0^2)^2]\}^{1/2}; w = 1/[\sigma^2(F_0)^2 + (aP)^2 + bP]; P = [(F_0^2,0) + 2(F_c)^2] / 3, \text{ where } a = 0.0929 \text{ and } b = 2.98$ |                                                                 |

**Table S3.** Selected bond lengths (Å) of **1**.

| Atom | Atom | Length/Å  | Atom | Atom | Length/Å   |
|------|------|-----------|------|------|------------|
| Co1  | O1   | 2.036 (3) | N1   | C6   | 1.334 (5)  |
| Co1  | O4   | 2.007 (3) | N1   | C24  | 1.343 (5)  |
| Co1  | O6   | 2.094 (3) | N4   | N3   | 1.236 (5)  |
| Co1  | O2   | 2.399 (3) | N4   | C33  | 1.437 (5)  |
| Co1  | N1   | 2.136 (3) | N5   | C27  | 1.337 (5)  |
| Co1  | N5   | 2.156 (3) | N5   | C15  | 1.338 (5)  |
| O1   | C35  | 1.267 (5) | N3   | C17  | 1.435 (5)  |
| O4   | C35  | 1.253 (5) | O5   | C9   | 1.205 (5)  |
| O6   | C32  | 1.256 (5) | C37  | O7   | 1.38 (2)   |
| O8   | C9   | 1.328 (5) | N2   | C19  | 1.574 (17) |
| O2   | C32  | 1.254 (5) |      |      |            |

**Table S4.** Selected bond angles ( $^{\circ}$ ) of **1**.

| Atom | Atom | Atom | Angle/ $^{\circ}$ | Atom | Atom | Atom | Angle/ $^{\circ}$ |
|------|------|------|-------------------|------|------|------|-------------------|
| O1   | Co1  | O6   | 90.29 (11)        | C27  | N5   | C15  | 117.6 (3)         |
| O1   | Co1  | O2   | 147.27 (11)       | C15  | N5   | Co1  | 121.2 (3)         |
| O1   | Co1  | N1   | 87.38 (11)        | N4   | N3   | C17  | 113.3 (3)         |
| O1   | Co1  | N5   | 91.12 (11)        | C27  | N5   | Co1  | 120.9 (3)         |
| O4   | Co1  | O1   | 125.32 (12)       | O6   | C32  | C34  | 119.0 (3)         |
| O4   | Co1  | O6   | 143.78 (12)       | O2   | C32  | O6   | 120.6 (4)         |
| O4   | Co1  | O2   | 87.38 (11)        | O2   | C32  | C34  | 120.2 (4)         |
| O4   | Co1  | N1   | 90.69 (11)        | O7   | C37  | N2   | 120 (2)           |
| O4   | Co1  | N5   | 88.12 (12)        | C6   | N1   | Co1  | 121.3 (2)         |
| O6   | Co1  | O2   | 57.57 (10)        | O4   | C35  | O1   | 123.1 (3)         |
| O6   | Co1  | N1   | 98.14 (11)        | O5   | C9   | O8   | 123.6 (4)         |
| O6   | Co1  | N5   | 84.38 (12)        | O5   | C9   | C22  | 123.1 (4)         |
| N1   | Co1  | O2   | 91.04 (11)        | C6   | N1   | C24  | 117.7 (3)         |
| C35  | O1   | Co1  | 117.7 (2)         | N2   | C37  | O7   | 127.5 (19)        |
| C35  | O4   | Co1  | 171.0 (3)         | C24  | N1   | Co1  | 121.0 (2)         |
| C32  | O6   | Co1  | 96.7 (2)          | N3   | N4   | C33  | 114.0 (3)         |
| C32  | O2   | Co1  | 82.9 (2)          |      |      |      |                   |



## Topological Analysis

#####

1:C37 H24 Co N4 O6, H2 O, C2 N O

#####

Topology for Co1

-----

Atom Co1 links by bridge ligands and has

| Common vertex with                  | R(A-A)  |  |   | f |
|-------------------------------------|---------|--|---|---|
| Co 1 -0.6426 1.4165 0.5670 (-1 1 0) | 13.298A |  | 1 |   |
| Co 1 1.3574 -0.5835 0.5670 (1-1 0)  | 13.298A |  | 1 |   |
| Co 1 0.3574 1.4165 -0.4330 (0 1-1)  | 17.254A |  | 1 |   |
| Co 1 0.3574 -0.5835 1.5670 (0-1 1)  | 17.254A |  | 1 |   |

| Common edge with                   | R(A-A)  |  |   |  |
|------------------------------------|---------|--|---|--|
| Co 1 0.6426 0.5835 0.4330 (1 1 1)  | 3.953A  |  | 2 |  |
| Co 1 0.6426 -0.4165 1.4330 (1 0 2) | 14.771A |  | 2 |  |

-----

Structural group analysis

-----

-----  
Structural group No 1  
-----

Structure consists of layers (1 1 1) with CoO6N4C37H24  
Num. groups=1; Thickness=6.60; Min.Distance=8.174

Coordination sequences

-----

|                                        |
|----------------------------------------|
| Co1: 1 2 3 4 5 6 7 8 9 10              |
| Num 6 14 22 30 38 46 54 62 70 78       |
| Cum 7 21 43 73 111 157 211 273 343 421 |

-----

TD10=421

Vertex symbols for selected sublattice

-----

Co1 Point symbol:{3^3.4^10.5.6}  
Extended point symbol:[3.3.3.4.4.4.4.4.4.4.4.4.5.6(4)]  
Rings with types: [\*.\*\*.\*.\*.\*.\*.\*.\*.\*.\*.\*.\*]

-----

Point symbol for net: {3^3.4^10.5.6}  
6-c net; uninodal net

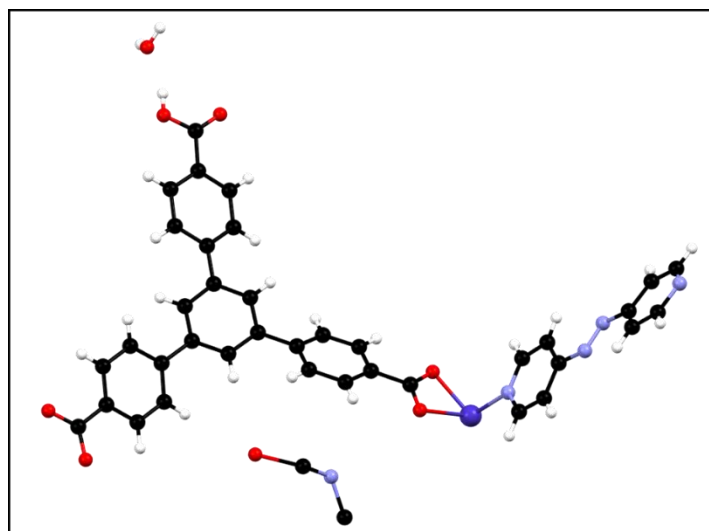

**Fig. S1** Asymmetric unit of **1** (Co: Blue, C: Black, O: Red, N: Sky-blue, H: off-white).

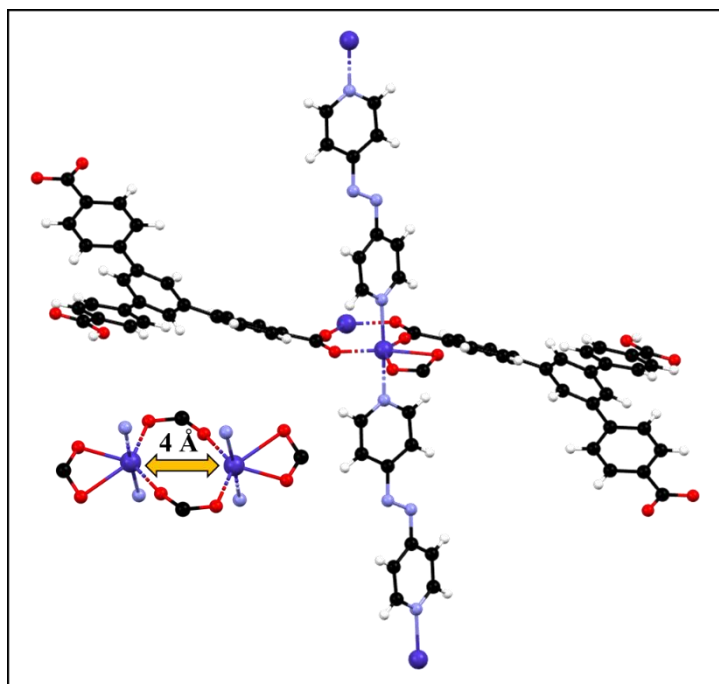

**Fig. S2** Coordination pattern of Co (II) centre in framework (Co: Blue, C: Black, O: Red, N: Sky-blue, H: off-white).

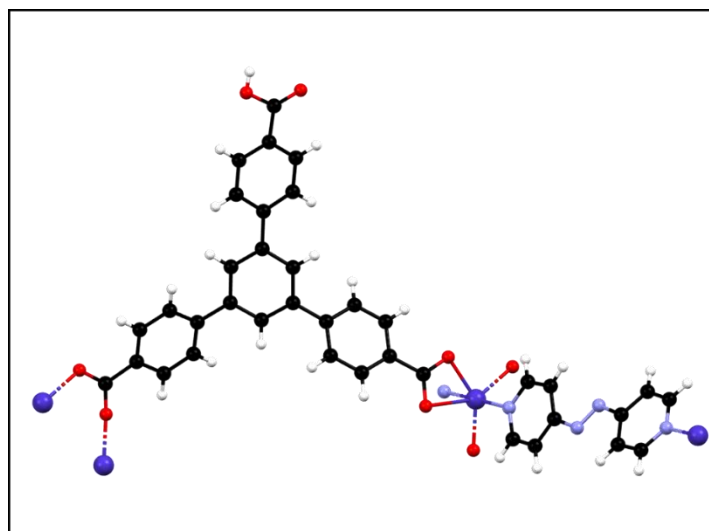

**Fig. S3** Coordination mode of BTB in framework (Co: Blue, C: Black, O: Red, N: Sky-blue, H: off-white).

## D. FT-IR spectra

(a)

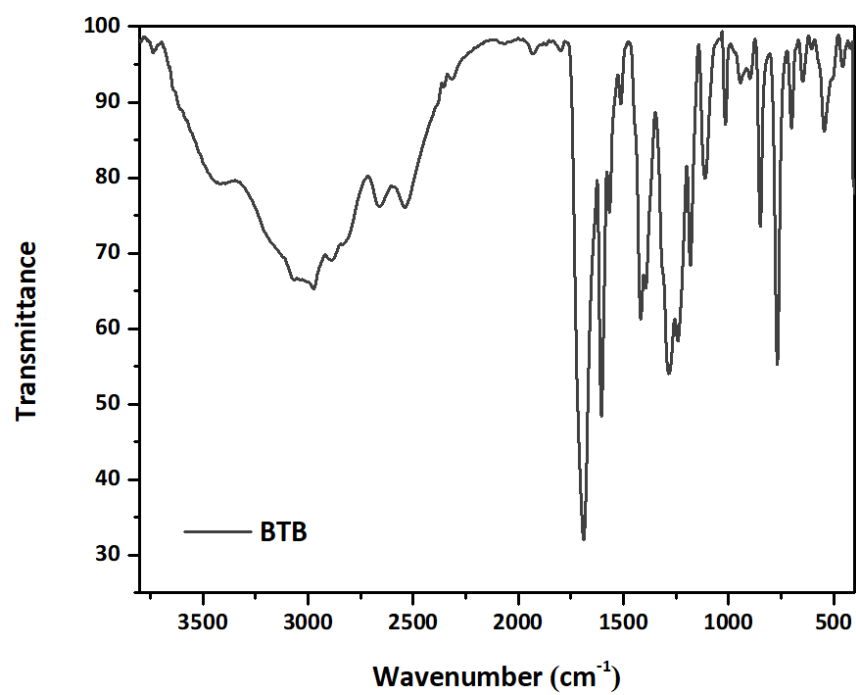

(b)

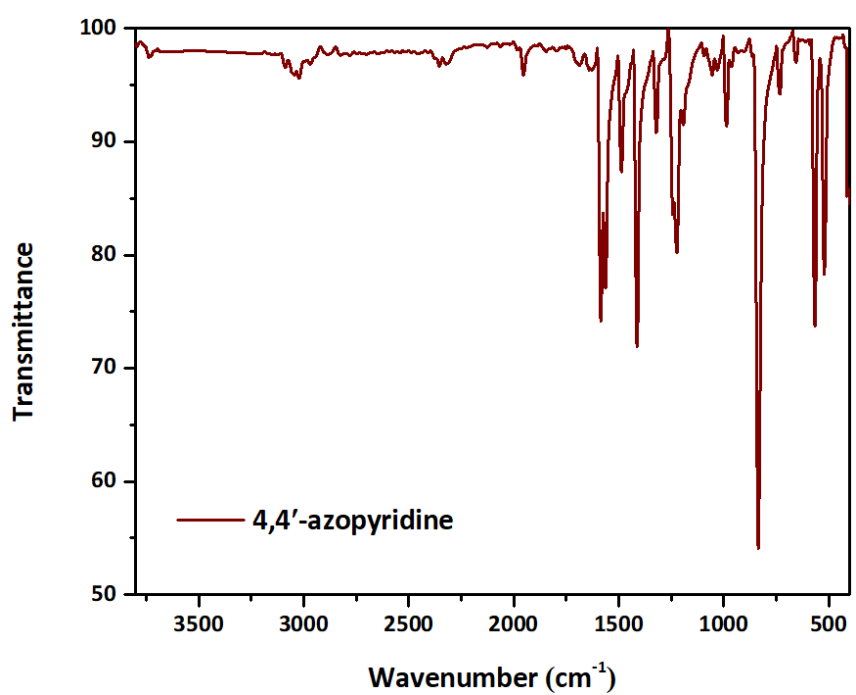

(c)

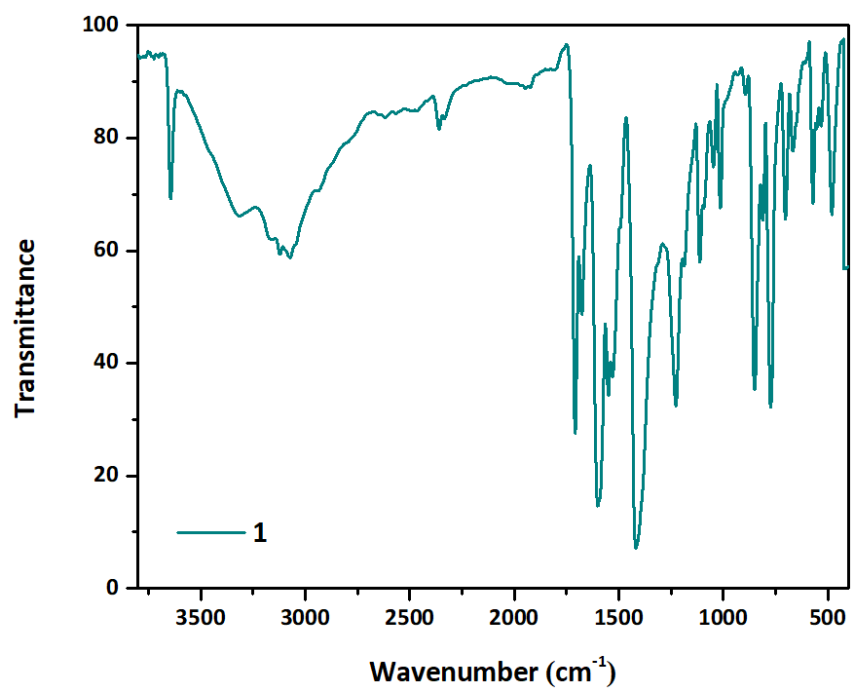

Fig. S4 FT-IR spectra of (a) BTB, (b) 4,4'-azopyridine and (c) 1.

## E. Powder XRD pattern

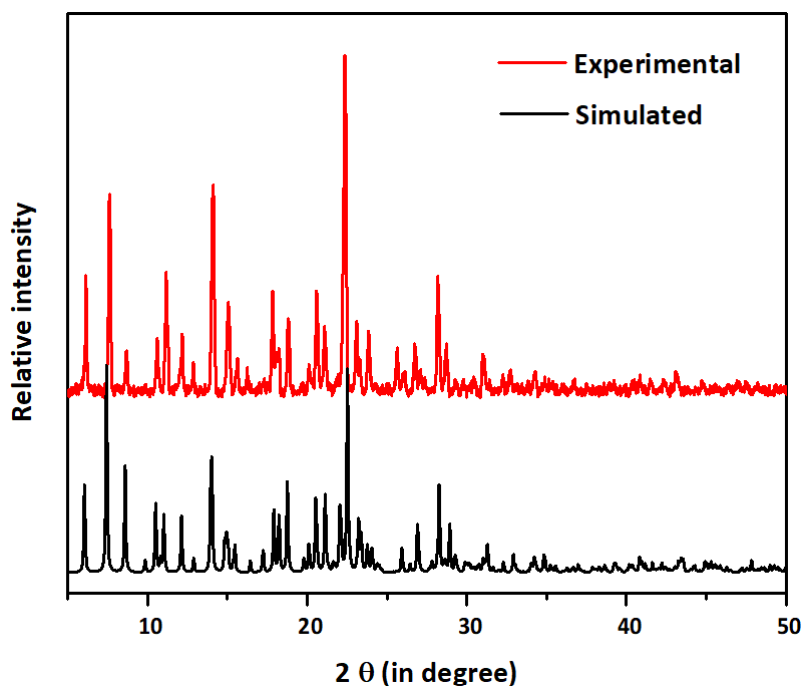

Fig. S5 PXRD pattern of simulated and as-synthesized **1**.

## F. Thermogravimetric analysis

(a)

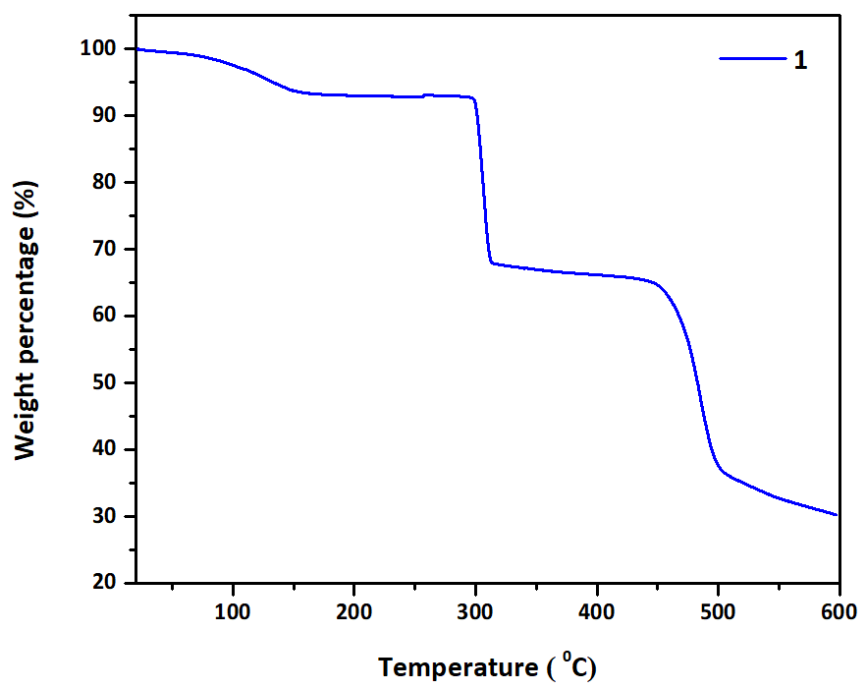

(b)

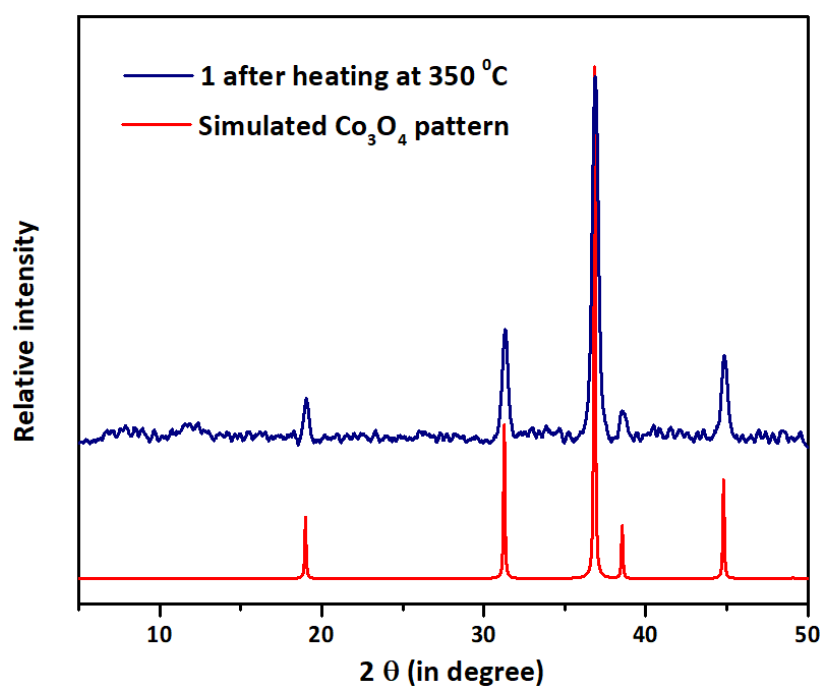

**Fig. S6** (a) Thermogravimetric analysis shows the thermal stability of **1** up to 295 °C, (b) PXRD confirms the formation of  $\text{Co}_3\text{O}_4$  after framework destruction at 350 °C.<sup>[S21]</sup>



## G. Steady-state spectroscopy

### UV-Vis absorption spectra

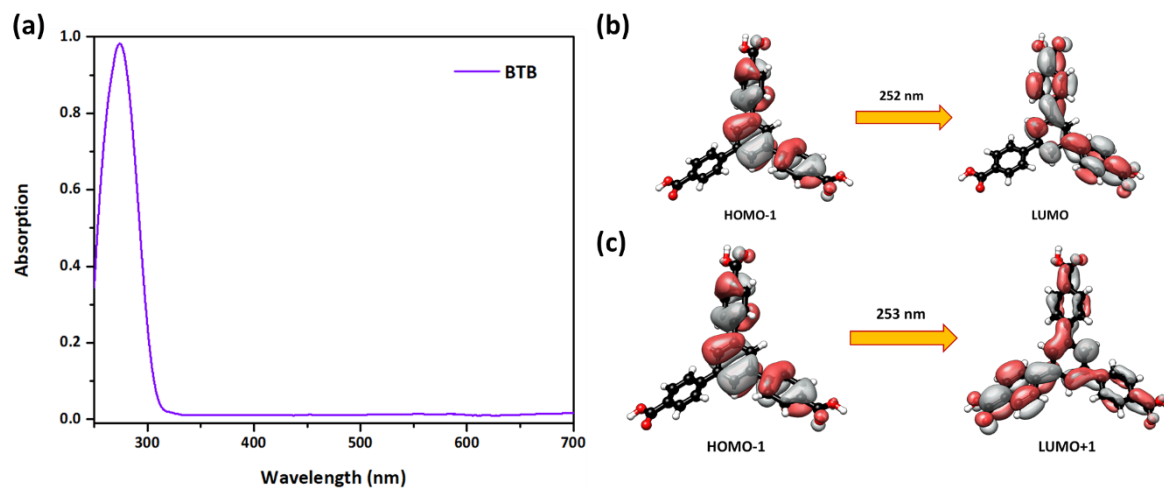

**Fig. S7** (a) UV-Vis absorption spectrum of BTB, and (b, c) pictorial representation of corresponding molecular orbitals associated to the electronic transitions.

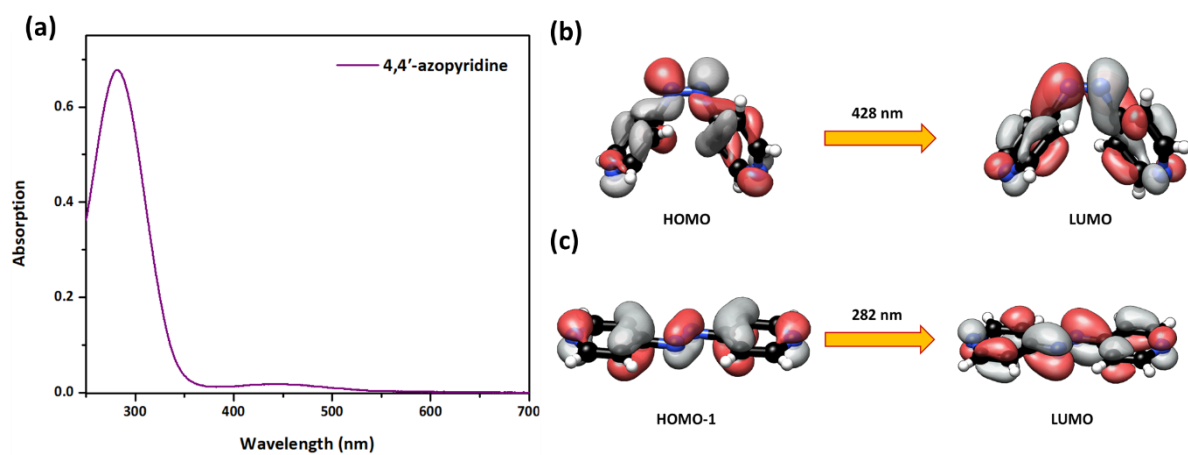

**Fig. S8** (a) UV-Vis absorption spectrum of 4,4'-azopyridine, pictorial representation of corresponding molecular orbitals of (b) *trans*- and (c) *cis*-conformer associated to these electronic transitions.

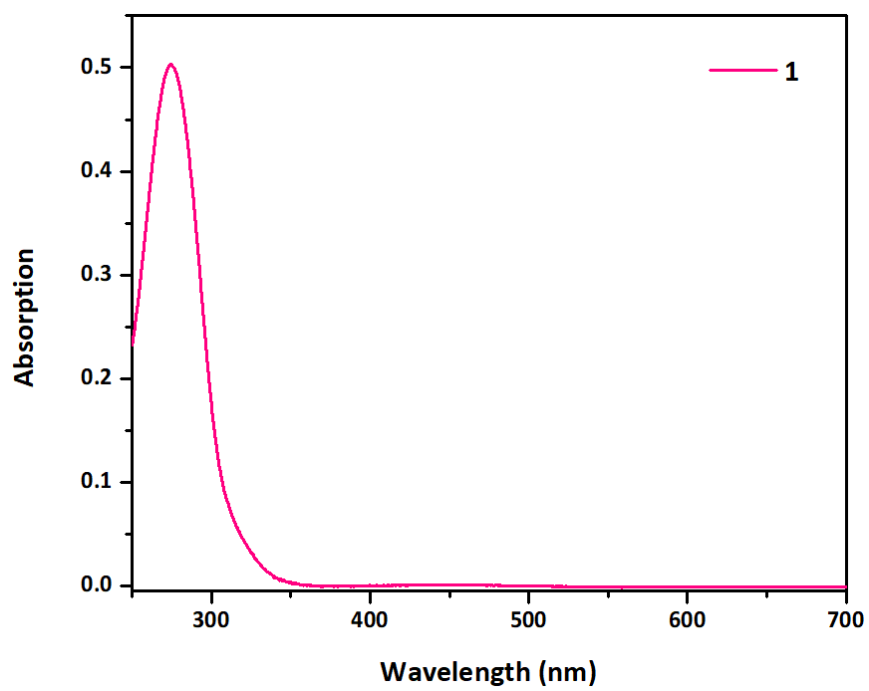

**Fig. S9** UV-Vis absorption spectrum of **1**.

## Emission spectra

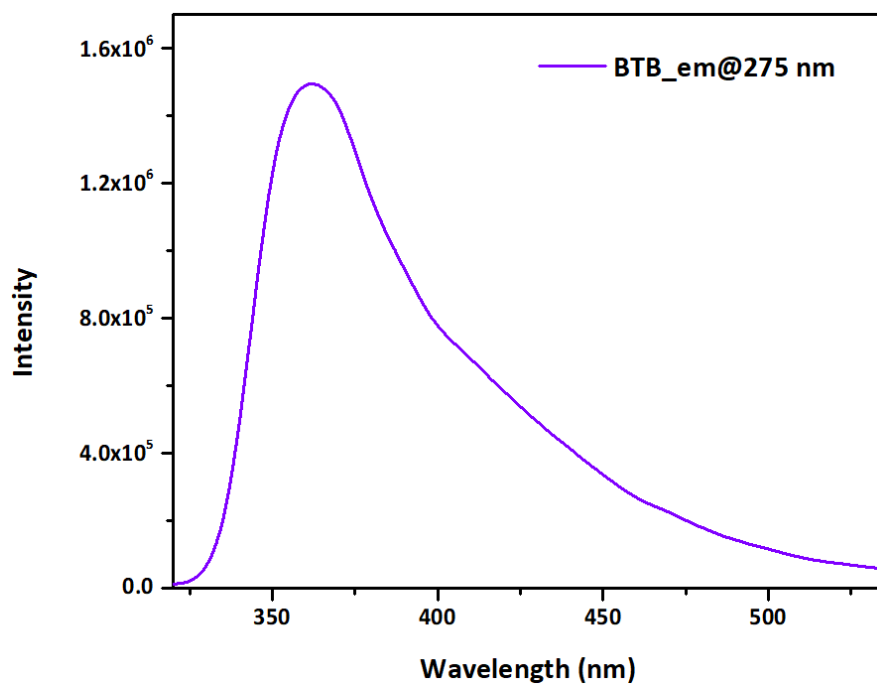

**Fig. S10** Emission spectra of BTB (excitation at 275 nm).

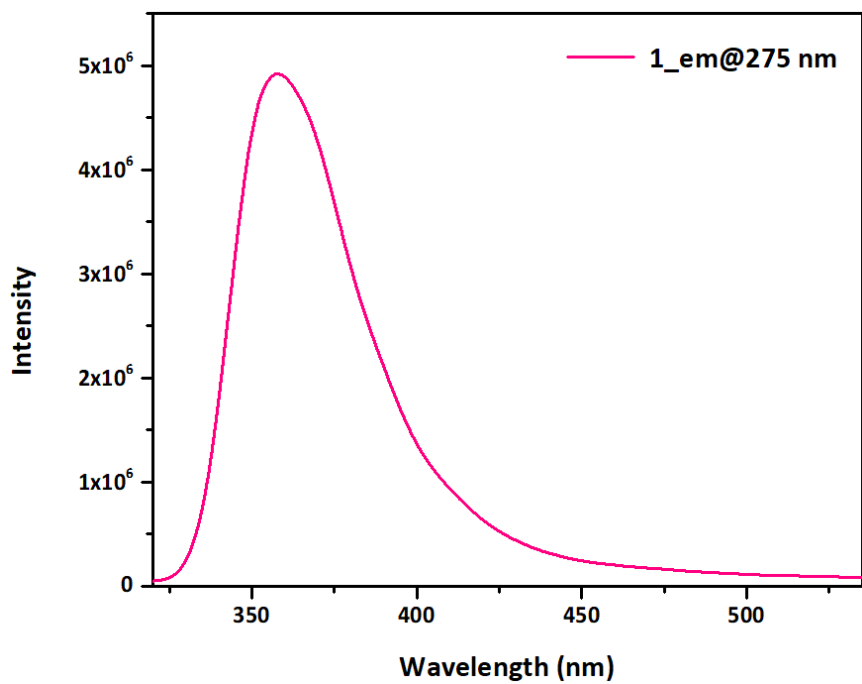

**Fig. S11** Emission spectra of **1** (excitation at 275 nm).

## Excitation spectra

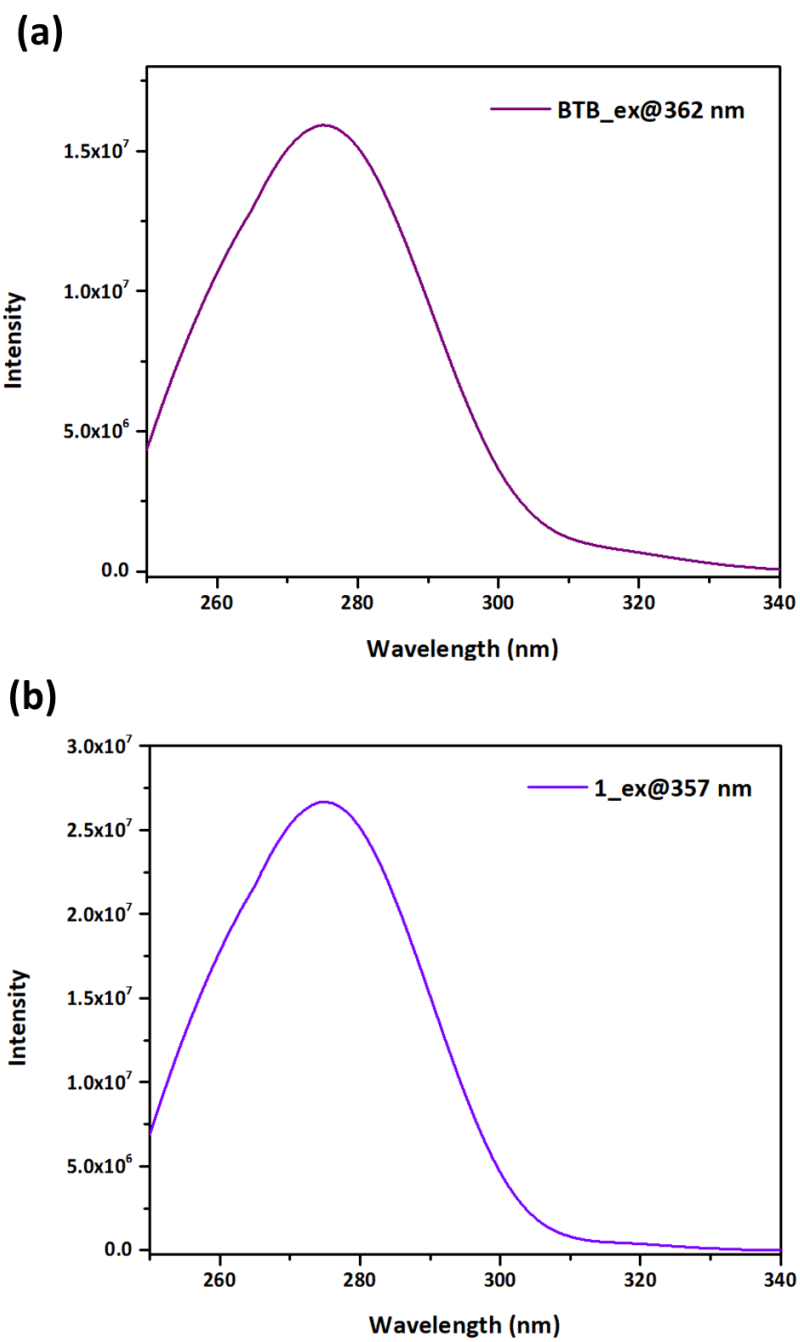

Fig. S12 Excitation spectra of the (a) BTB and (b) 1.

## H. Fluorescence lifetime decay profile of BTB and **1**

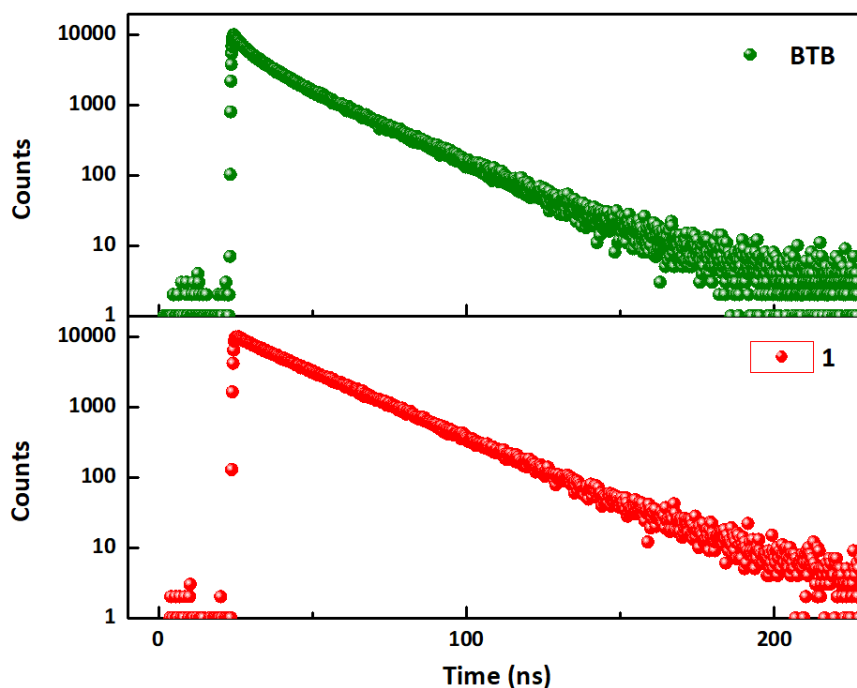

**Fig. S13** The lifetime decay profile of (a) BTB and (b) **1** ( $\lambda_{\text{ex}} = 310 \text{ nm}$ ;  $\lambda_{\text{probe}} = 357 \text{ nm}$ ).

**Table S5.** Detail parameters of the fitted fluorescence decay plot of BTB in water.

| $\lambda_{\text{excitation}}$ | $\lambda_{\text{detection}}$ | $\alpha_1$ | $\tau_1 \text{ (ns)}$ | $\alpha_2$ | $\tau_2 \text{ (ns)}$ | $\chi_2$ |
|-------------------------------|------------------------------|------------|-----------------------|------------|-----------------------|----------|
| 310 nm                        | 357 nm                       | 0.19       | 5.243                 | 0.81       | 21.114                | 1.14     |

**Table S6.** Detail parameters of the fitted fluorescence decay plot of **1** in water.

| $\lambda_{\text{excitation}}$ | $\lambda_{\text{detection}}$ | $\alpha_1$ | $\tau_1 \text{ (ns)}$ | $\alpha_2$ | $\tau_2 \text{ (ns)}$ | $\chi_2$ |
|-------------------------------|------------------------------|------------|-----------------------|------------|-----------------------|----------|
| 310 nm                        | 357 nm                       | 0.02       | 5.769                 | 0.98       | 22.883                | 1.11     |

## I. Stability test in water

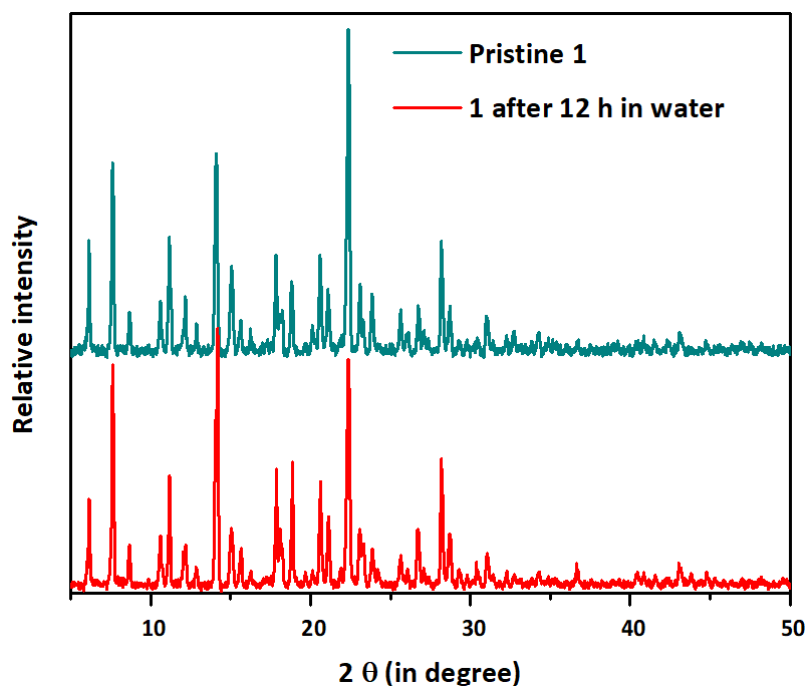

Fig. S14 PXRD of the **1** before and after kept in water for 12 h.



## J. Faraday-Tyndall experiment and DLS study

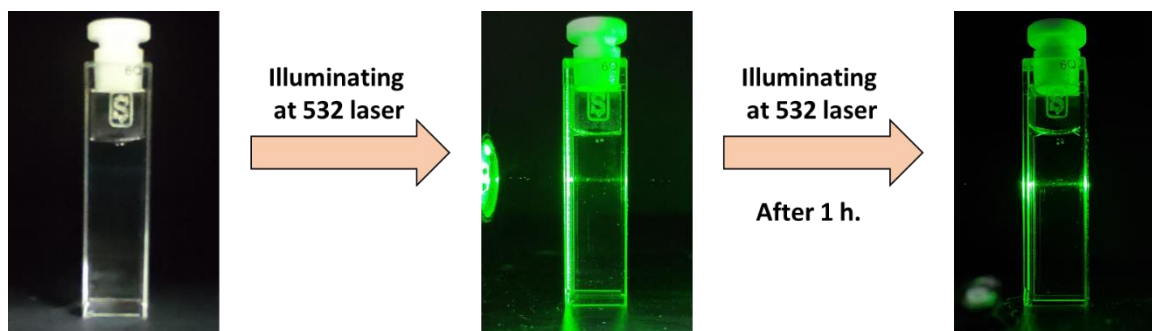

**Fig. S15** Faraday-Tyndall effect showing uniform dispersibility of the solution and also after 1 h.

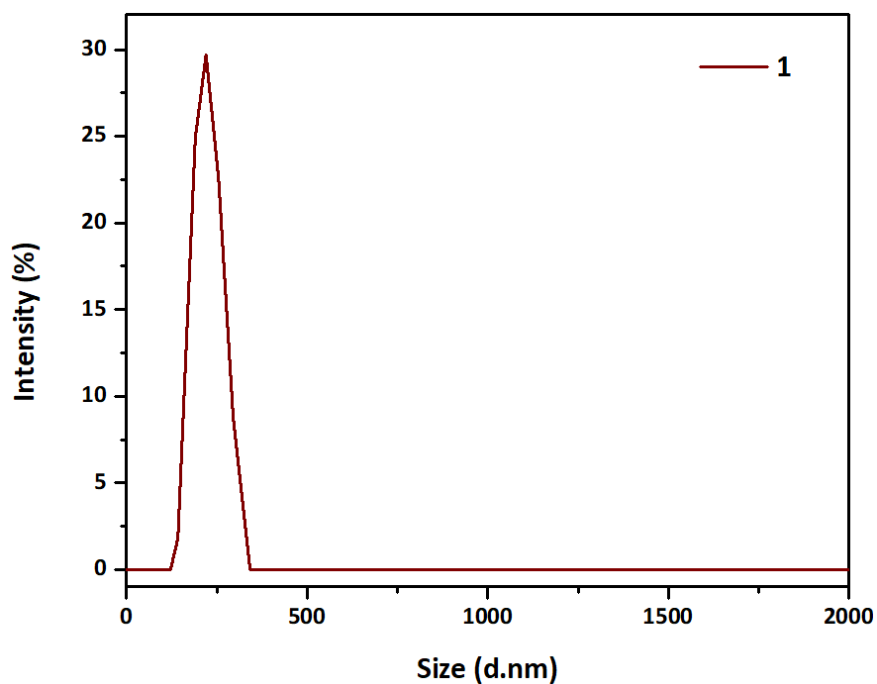

**Fig. S16** Dynamic light scattering (DLS) study showing uniformly dispersed **1** particle in water with an average particle diameter of 219 nm.

## K. Limit of detection calculation for Pb (II) ion

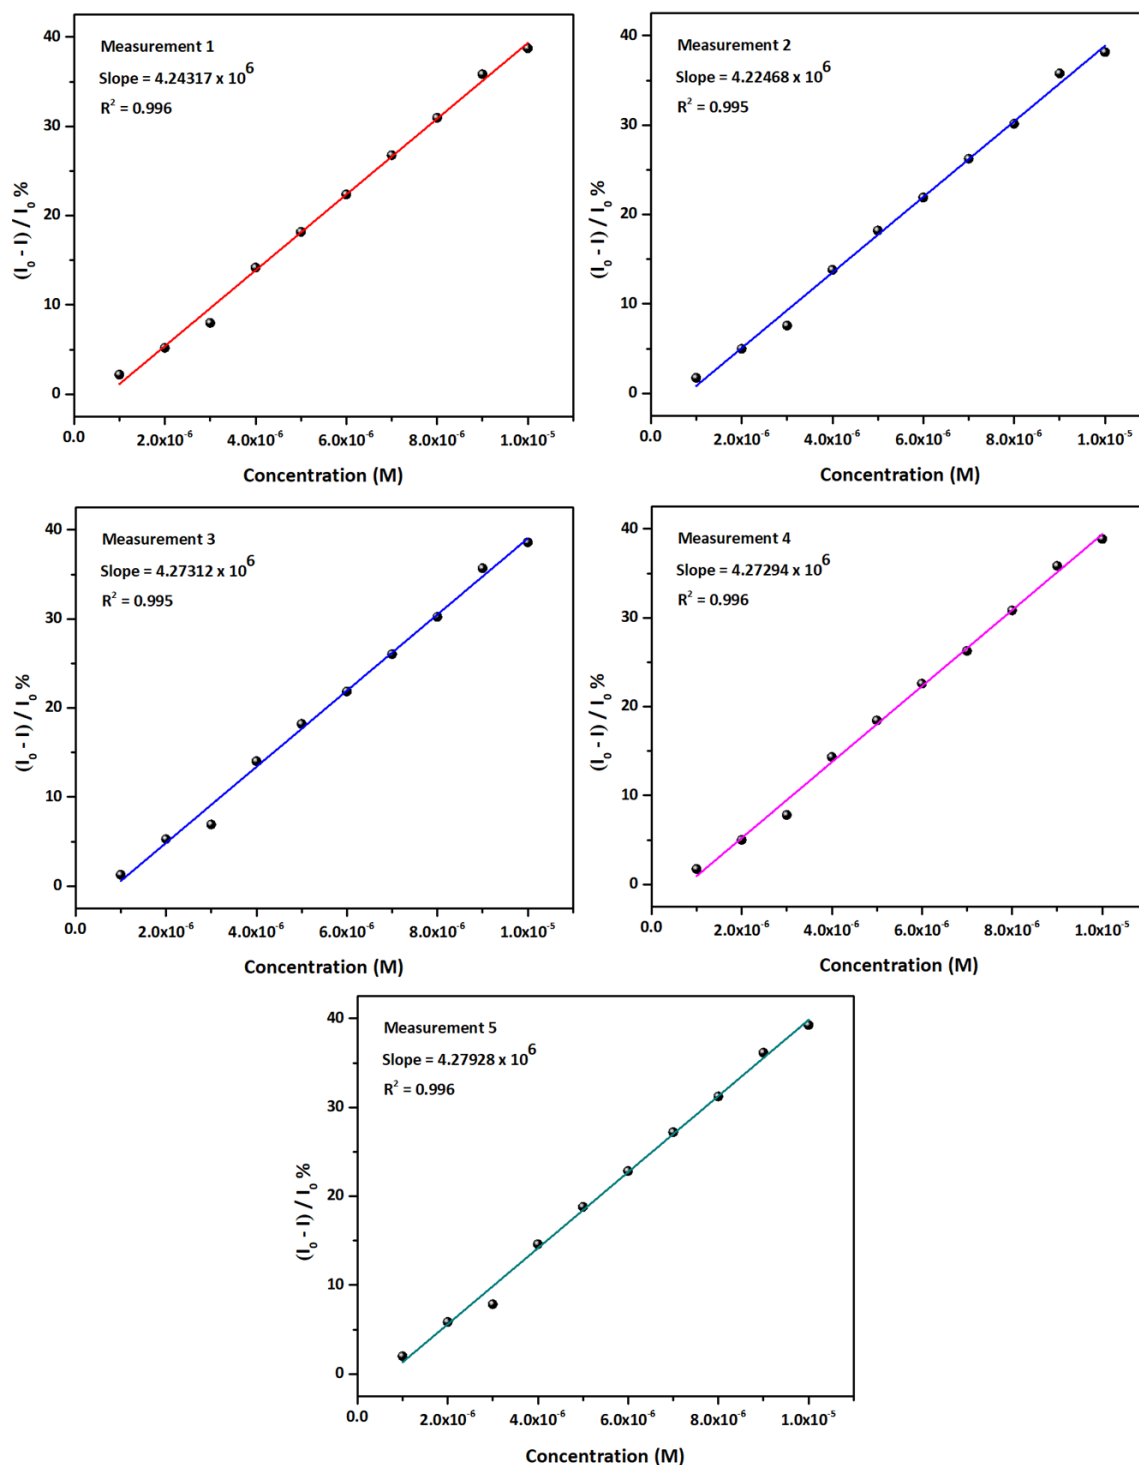

**Fig. S17** Emission quenching ratio (at 357 nm) with respect to Pb (II) concentration fitted in a linear relationship to obtain the slope for limit of detection (LOD) calculation.

## L. Recyclability tests

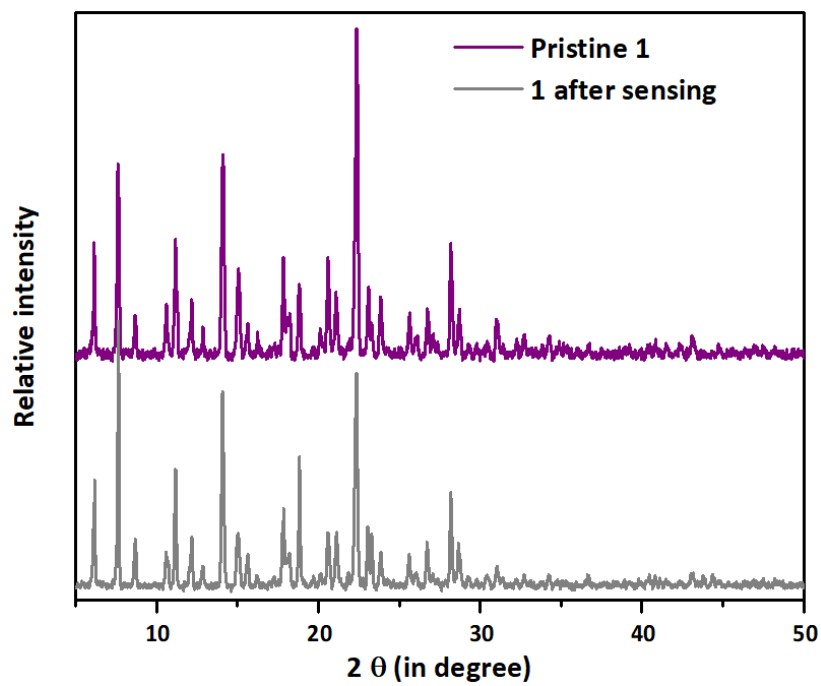

Fig. S18 PXR D of **1** before and after Pb (II) sensing.

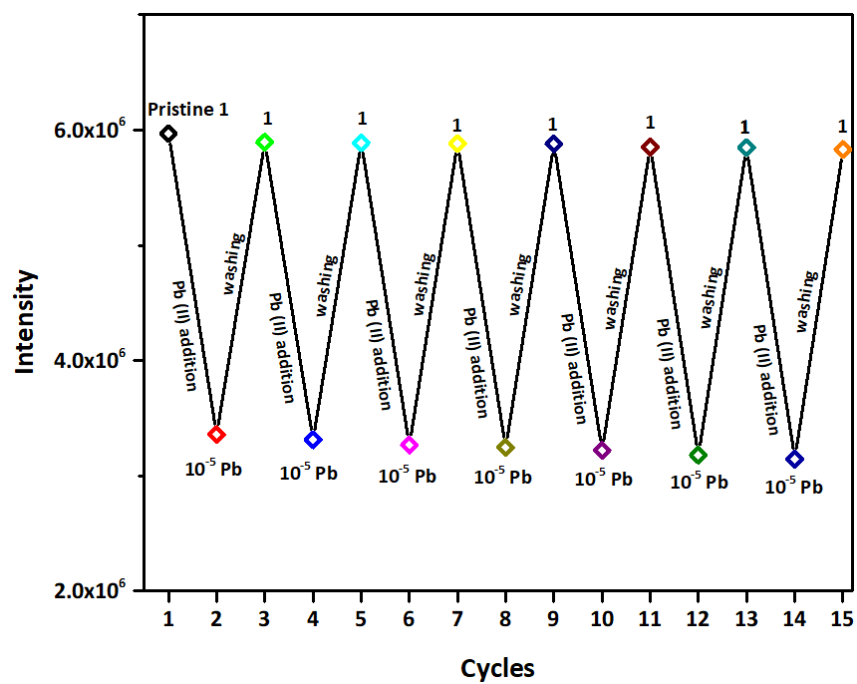

**Fig. S19** Retention of emission intensity and quenching efficiency of **1** upon Pb (II) sensing and being washed with water in alternative cycles.

## M. Sensing at different pH

(a)

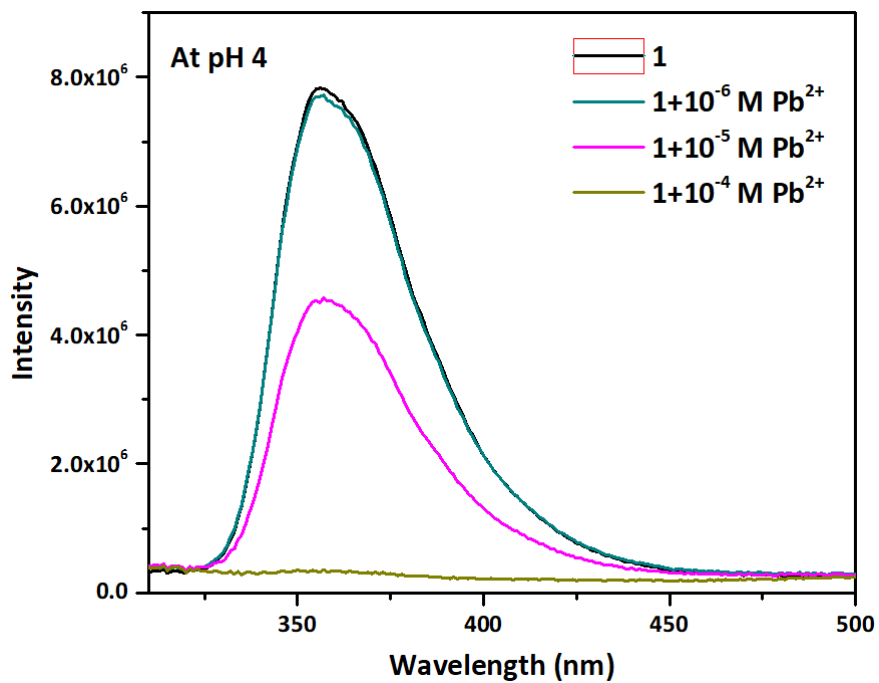

(b)

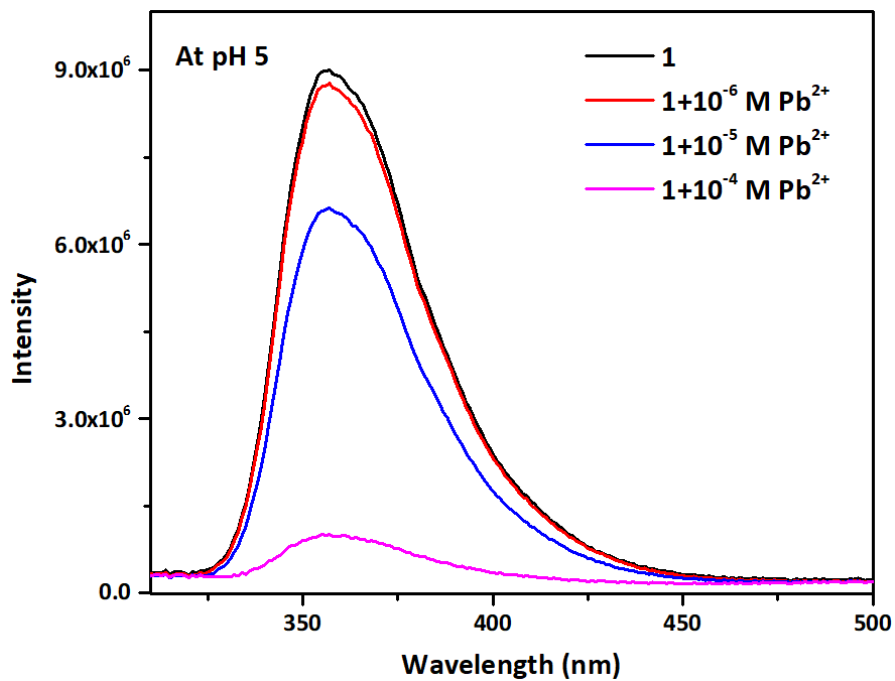

(c)

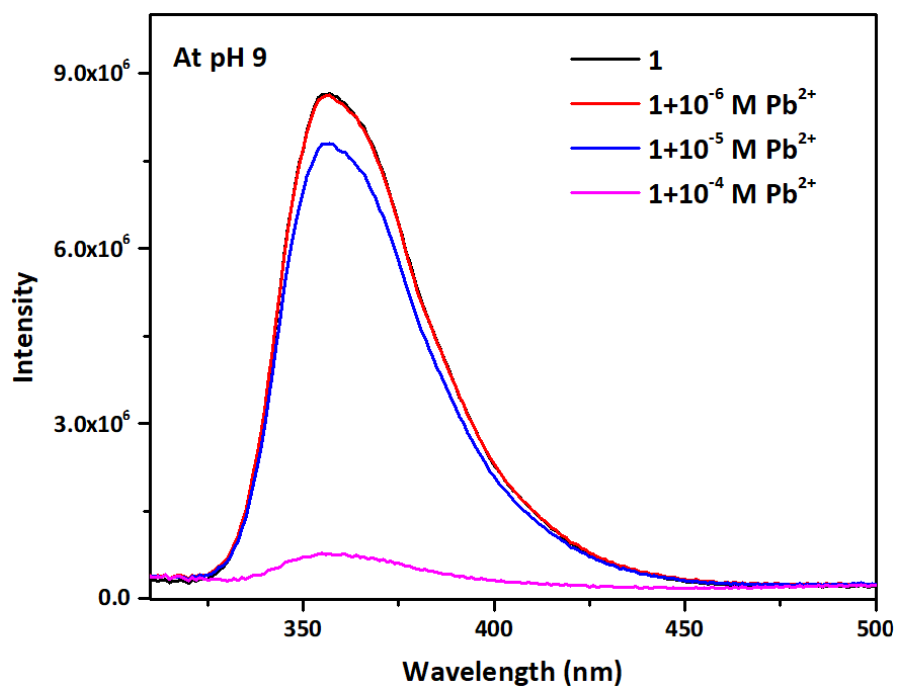

Fig. S20 Pb (II) sensing at different pH of the reaction medium.

## N. Spiking

**Table S7.** Pb (II) spiking from natural water resources.

| Water resources | Added Pb (II) concentration (M) | Detected Pb (II) concentration ( $\mu\text{M}$ ) |
|-----------------|---------------------------------|--------------------------------------------------|
| River water     | $10^{-5}$                       | $1.2 \times 10^{-5}$                             |
|                 | $10^{-6}$                       | $10^{-6}$                                        |
| Drinking water  | $10^{-5}$                       | $1.1 \times 10^{-5}$                             |
|                 | $10^{-6}$                       | $10^{-6}$                                        |
| Tap water       | $10^{-5}$                       | $10^{-5}$                                        |
|                 | $10^{-6}$                       | $0.9 \times 10^{-6}$                             |

### O. Absorption spectra of 1 with different Pb (II) ion concentrations

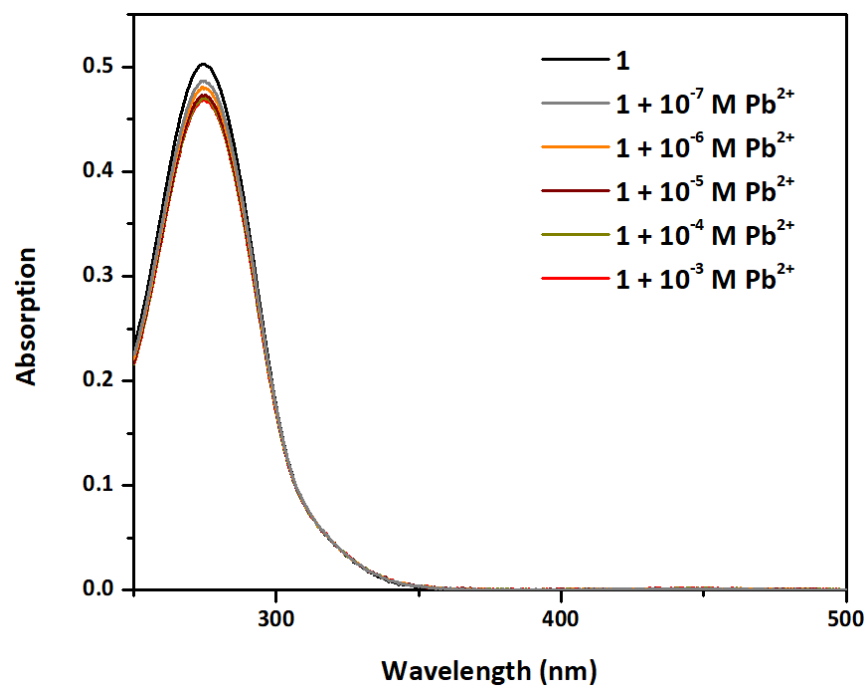

Fig. S21 Absorption spectra of 1 in pristine state and after adding Pb (II) in increasing concentrations.



**P. Table S8.** Detail parameters of the fitted fluorescence decay plot of **1** after adding PbCl<sub>2</sub> aqueous solution.

| $\lambda_{\text{excitation}}$ | $\lambda_{\text{detection}}$ | $\alpha_1$ | $\tau_1$ (ns) | $\alpha_2$ | $\tau_2$ (ns) | $\alpha_3$ | $\tau_3$ (ns) | $\chi^2$ |
|-------------------------------|------------------------------|------------|---------------|------------|---------------|------------|---------------|----------|
| 310 nm                        | 357 nm                       | 0.10       | 0.489         | 0.03       | 5.978         | 0.87       | 22.606        | 0.97     |

## Q. Stern-Volmer plots

(a)

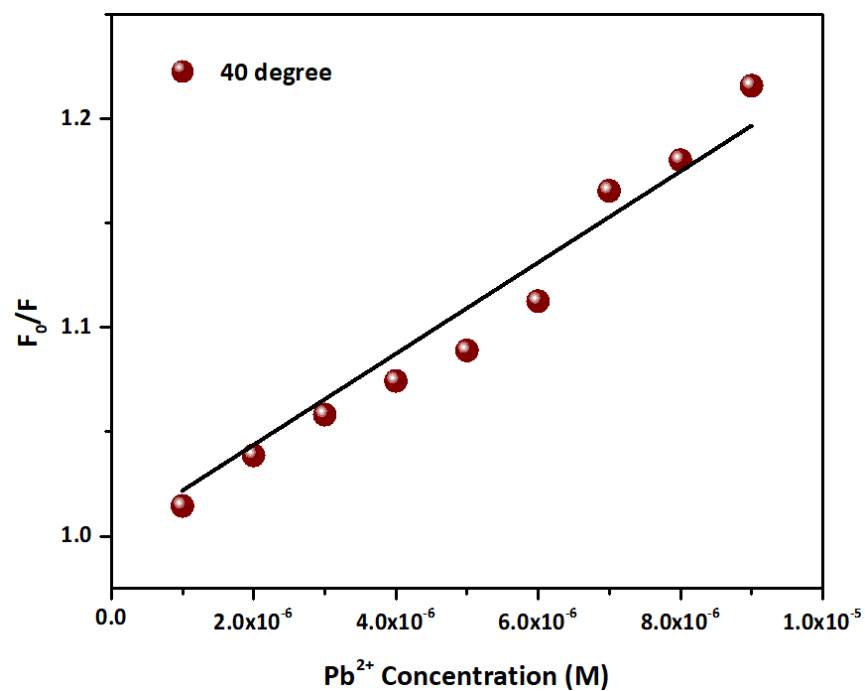

(b)

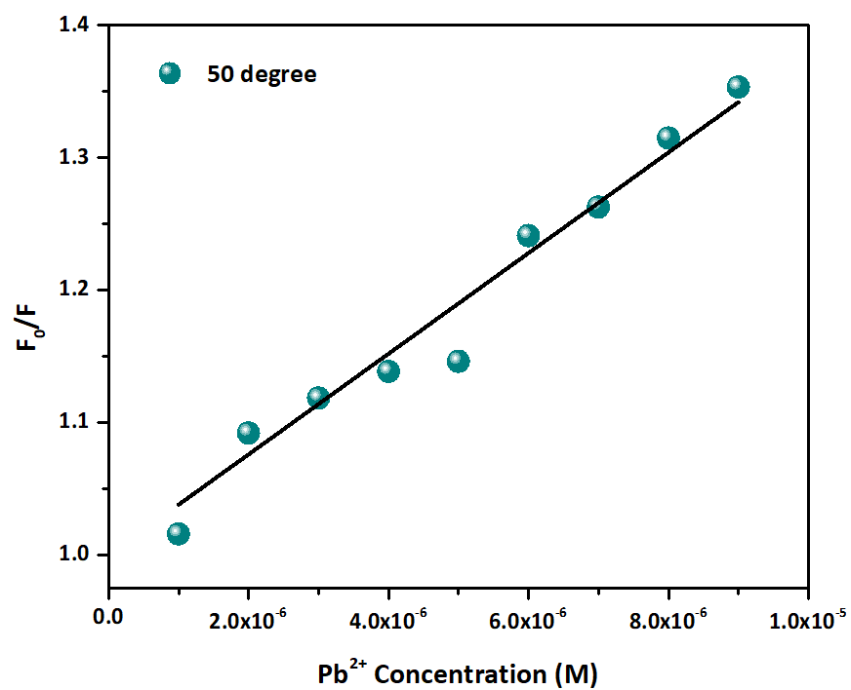

Fig. S22 The Stern-Volmer plots of **1** at two different temperatures.

## R. Host-guest interaction

We optimized the possible orientations (named as adduct 1-6 as Figs. 5 and S23-S27, respectively) of  $\text{PbCl}_2$  over the BTB molecule, (a) one  $\text{PbCl}_2$  molecule on each individual peripheral benzene moiety (Figs. 5, S23-S24), (b) one  $\text{PbCl}_2$  molecule on central benzene moiety (Fig. S25), (c) two  $\text{PbCl}_2$  molecules on two peripheral benzene moieties (Fig. S26), (d) two  $\text{PbCl}_2$  molecules on central benzene moiety (Fig. S27).

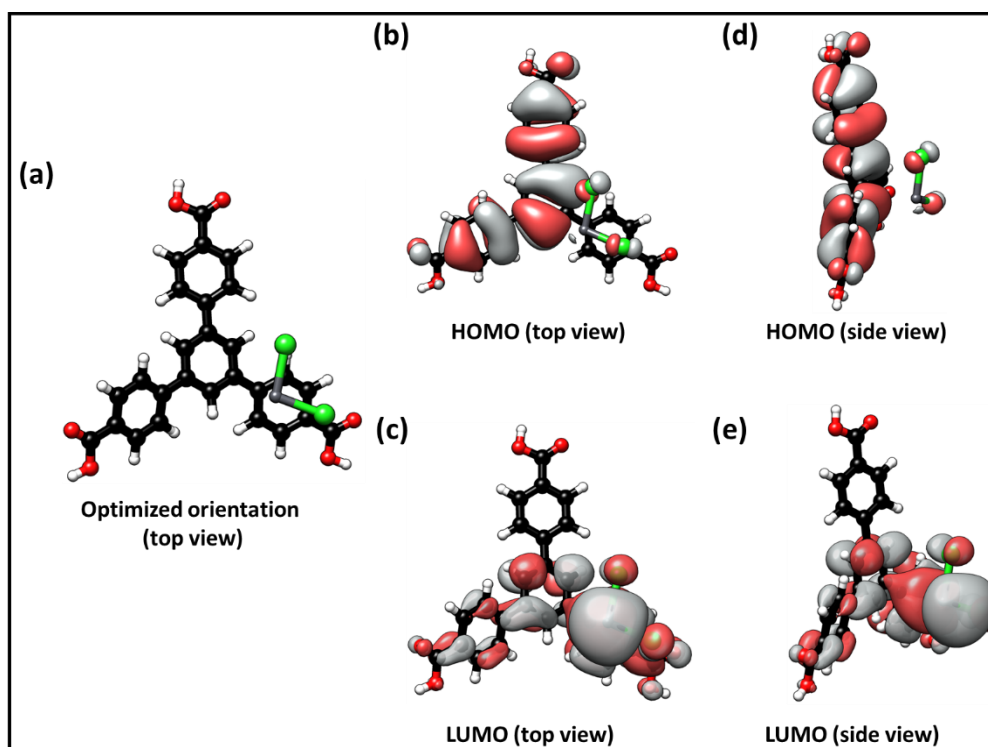

**Fig. S23** Adduct 2: (a) Optimized  $\text{PbCl}_2$  position on BTB molecule (peripheral benzene moiety), their corresponding HOMO (b: top view, c: side view) and LUMO (d: top view, e: side view).

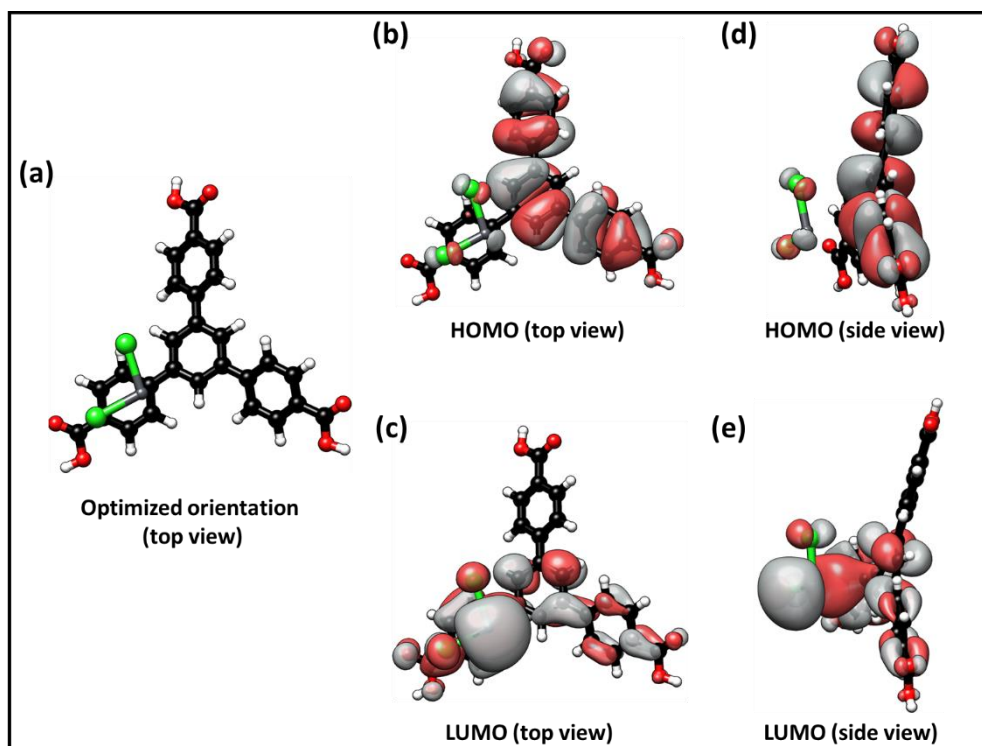

**Fig. S24** Adduct 3:(a) Optimized  $\text{PbCl}_2$  position on BTB molecule (peripheral benzene moiety), their corresponding HOMO (b: top view, c: side view) and LUMO (d: top view, e: side view).

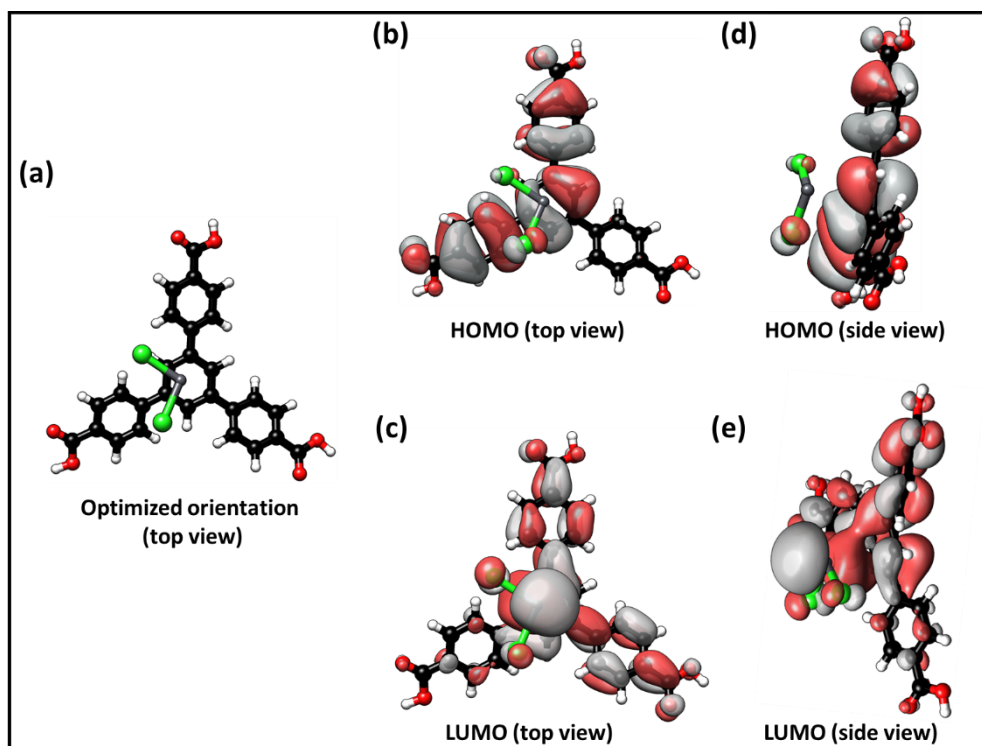

**Fig. S25** Adduct 4: (a) Optimized PbCl<sub>2</sub> position on BTB molecule (central benzene moiety), their corresponding HOMO (b: top view, c: side view) and LUMO (d: top view, e: side view).

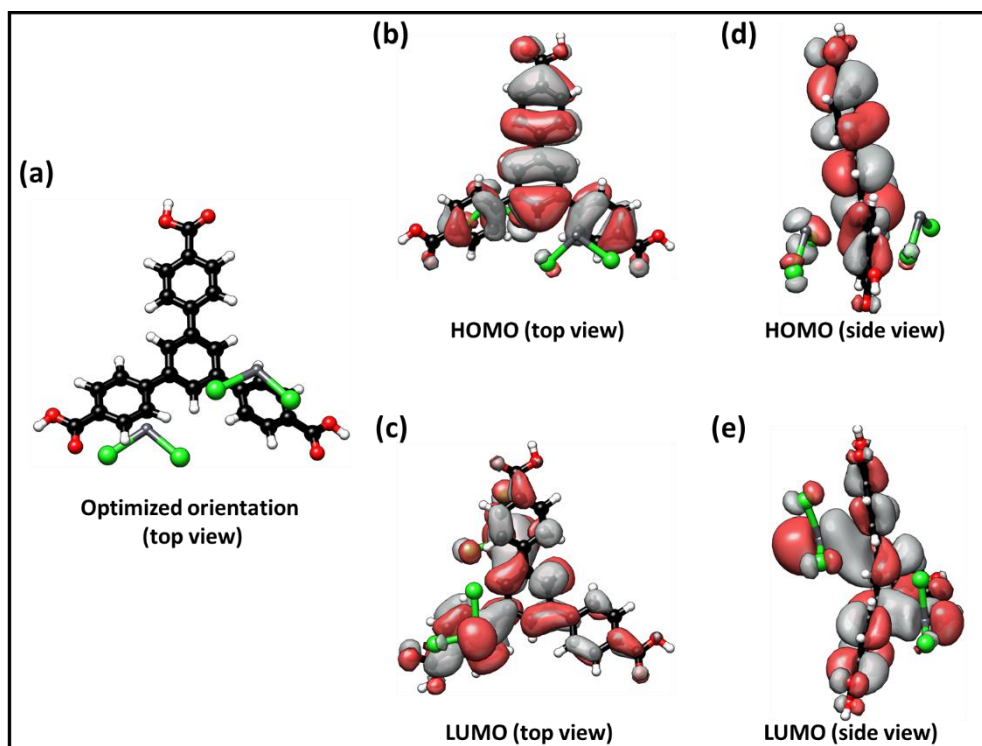

**Fig. S26** Adduct 5: (a) Optimized  $\text{PbCl}_2$  position on BTB molecule (two  $\text{PbCl}_2$  molecules each on two peripheral benzene moieties), their corresponding HOMO (b: top view, c: side view) and LUMO (d: top view, e: side view).

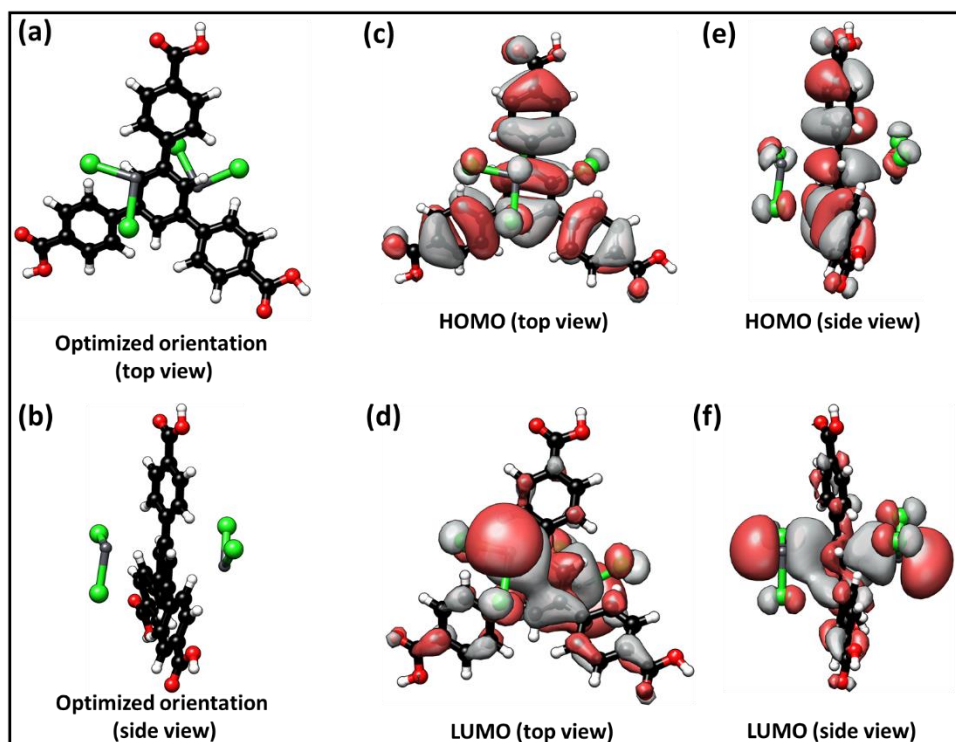

**Fig. S27** Adduct 6: (a) Optimized  $\text{PbCl}_2$  position on BTB molecule (two  $\text{PbCl}_2$  molecules on central benzene moieties), their corresponding HOMO (b: top view, c: side view) and LUMO (d: top view, e: side view).

**Table S9.** Stabilization energy of optimized PbCl<sub>2</sub> on BTB molecule.

| <b>Adduct No.</b>     | <b>Stabilization Energy (eV) per PbCl<sub>2</sub></b> |
|-----------------------|-------------------------------------------------------|
| Adduct 1 (Figure 5)   | 0.579                                                 |
| Adduct 2 (Figure S20) | 0.584                                                 |
| Adduct 3 (Figure S21) | 0.563                                                 |
| Adduct 4 (Figure S22) | 0.759                                                 |
| Adduct 5 (Figure S23) | 0.593                                                 |
| Adduct 6 (Figure S24) | 0.734                                                 |



## S. Limit of detection calculation for Hg (II) ion

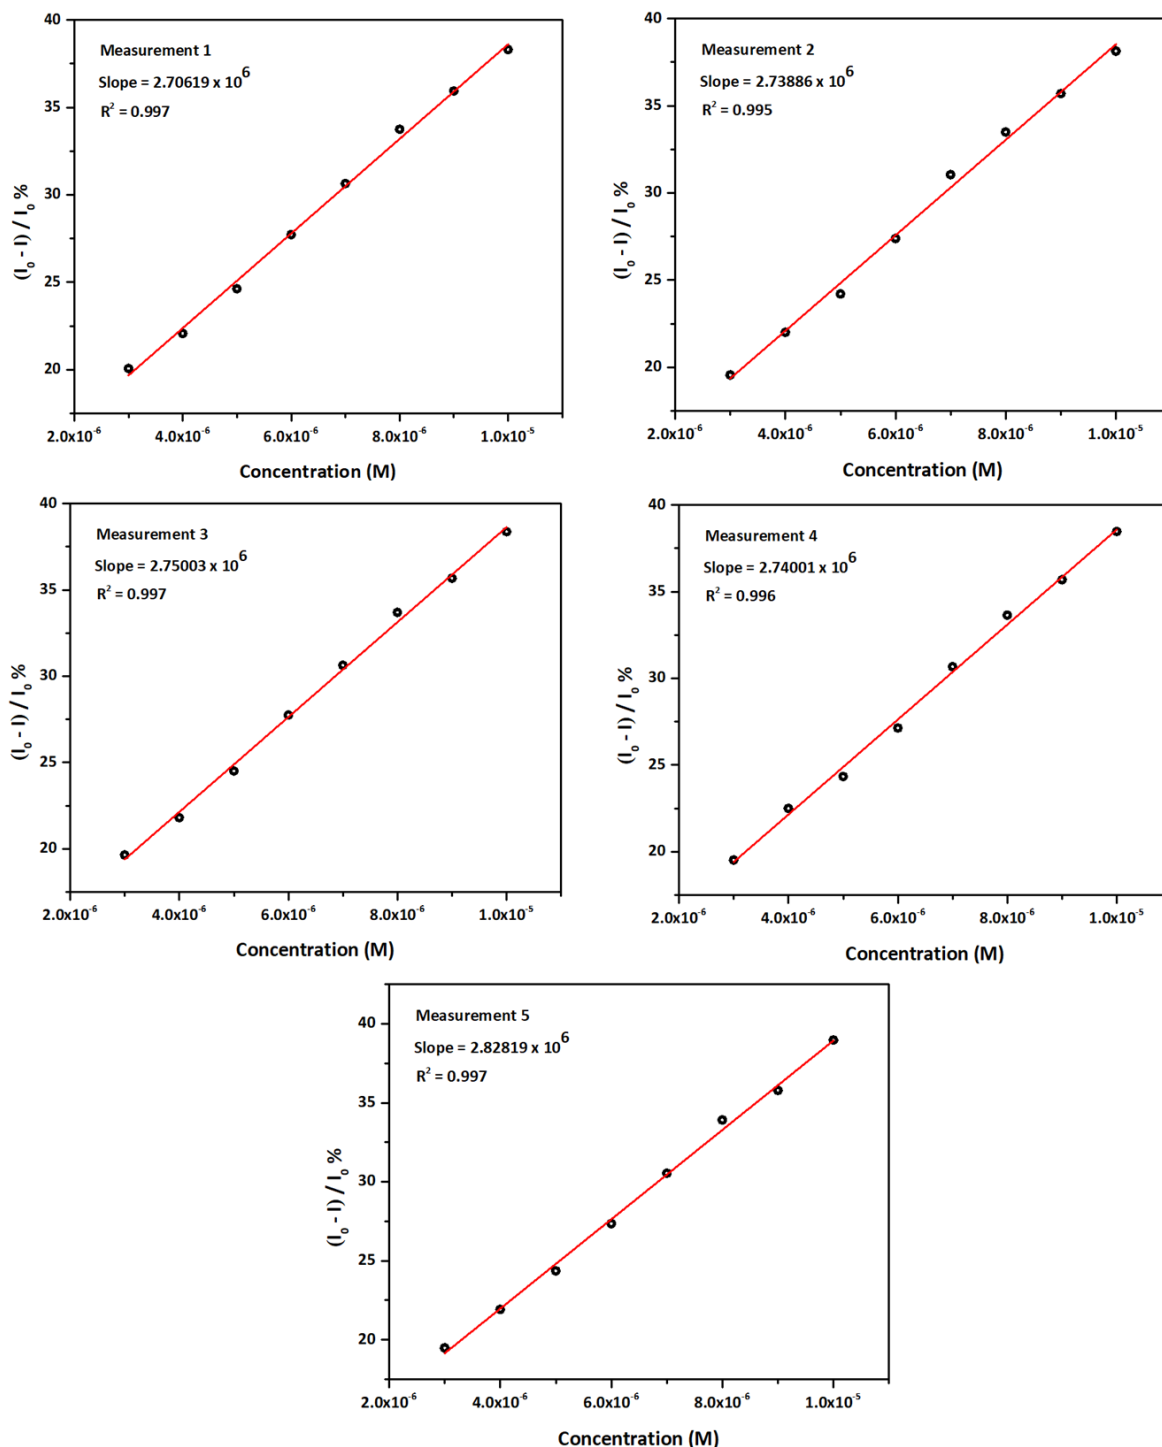

**Fig. S28** Emission quenching ratio (at 357 nm) with respect to Hg (II) concentration fitted in a linear relationship to obtain the slope for limit of detection (LOD) calculation.

## T. Anti-inference ability of 1 for Hg (II) sensing and comparison

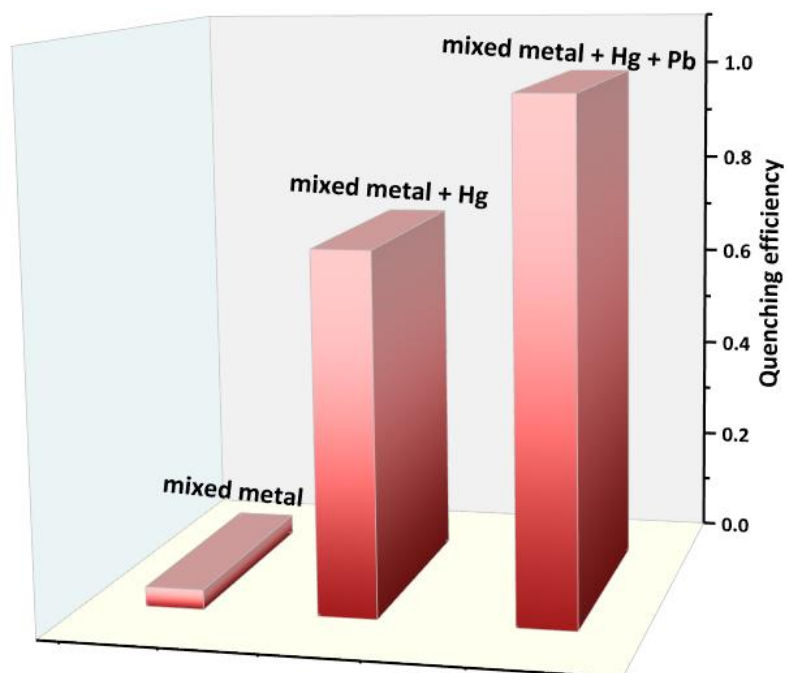

**Fig. S29** Selective sensing of Hg (II) in presence of mixed metal ions (middle bar), whereas right bar shows more sensing efficiency of Pb (II) in presence of all metal ions and Hg (II) ions in the aqueous solution.

### U. Absorption spectra of **1** with different Hg (II) ion concentrations

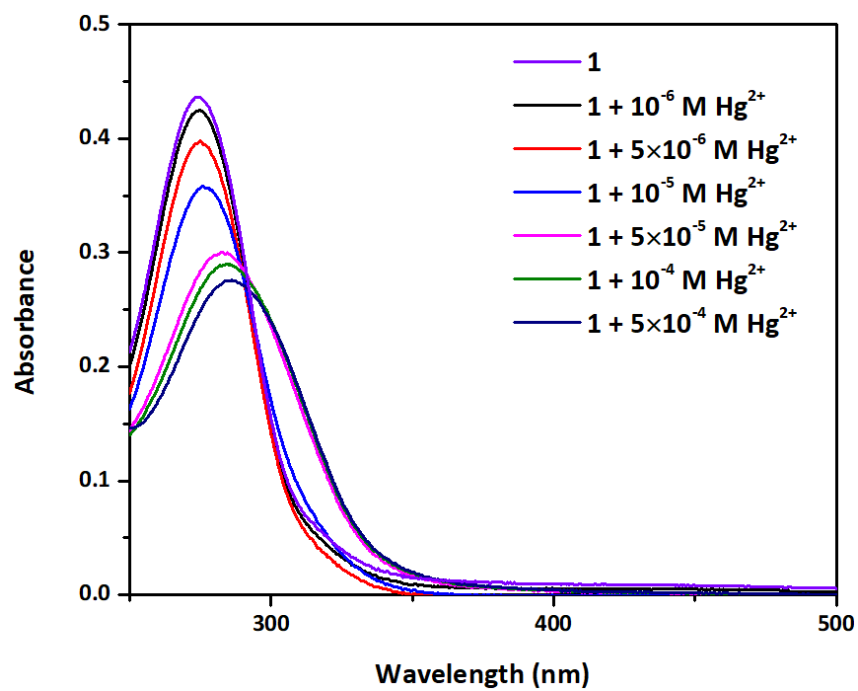

**Fig. S30** Absorption spectra of **1** in pristine state and after adding Hg (II) with increasing concentrations.

## V. XPS spectra

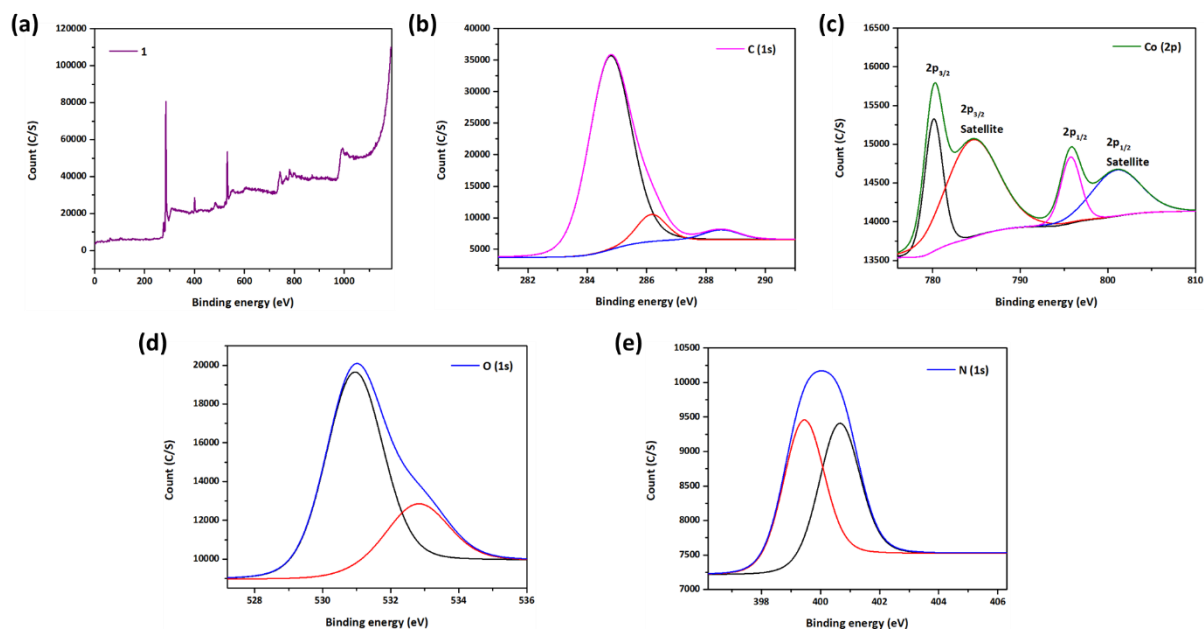

**Fig. S31** XPS spectra of pristine **1**: (a) survey, (b) C 1s, (c) Co 2p, (d) O 1s, (e) N 1s spectrum.

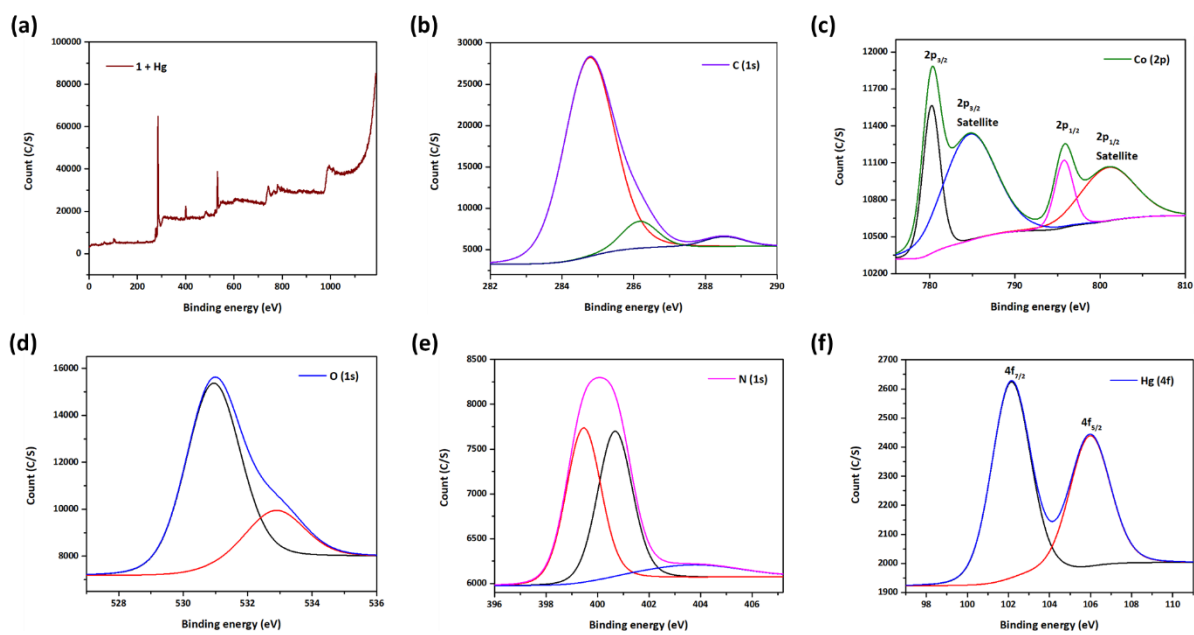

**Fig. S32** XPS spectra of pristine **1** after addition of Hg (II) solution: (a) survey, (b) C 1s, (c) Co 2p, (d) O 1s, (e) N 1s, (f) Hg 4f spectrum.

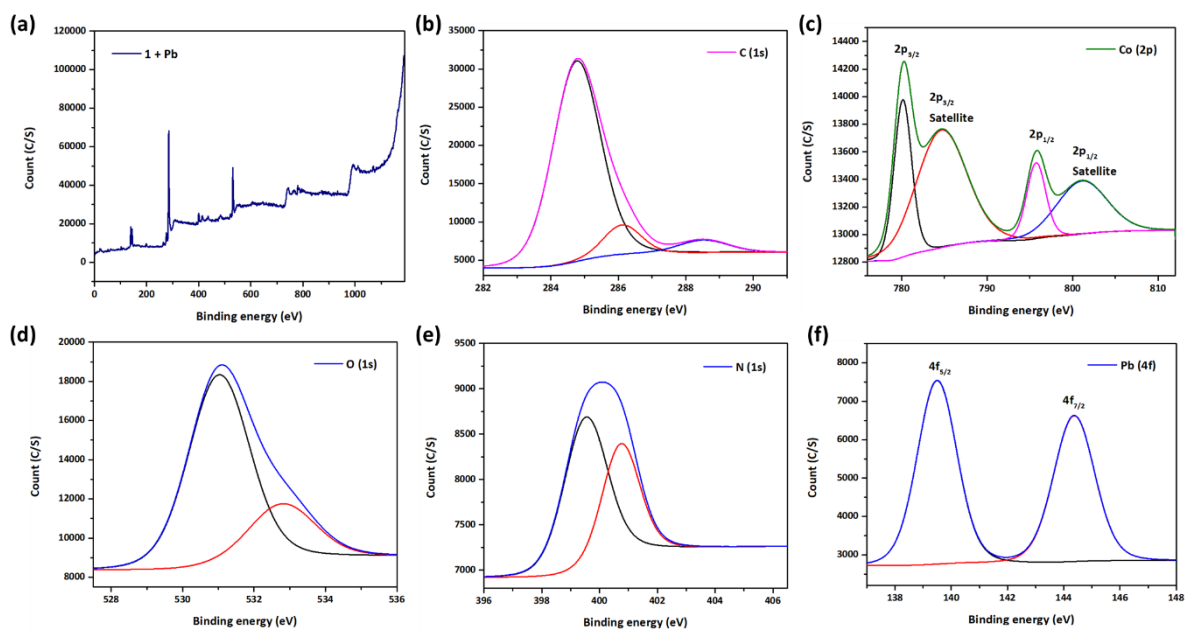

**Fig. S33** XPS spectra of pristine **1** after addition of Pb (II) solution: (a) survey, (b) C 1s, (c) Co 2p, (d) O 1s, (e) N 1s, (f) Pb 4f spectrum.

### W. Fluorescence lifetime decay profile of **1** after addition of HgCl<sub>2</sub> solution

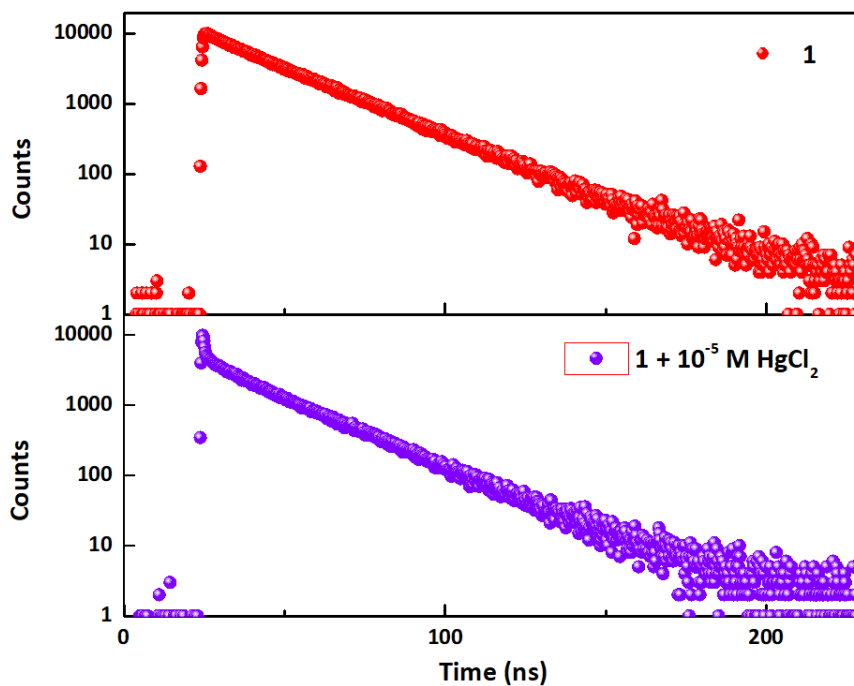

**Fig. S34** The comparative lifetime decay profile of (a) **1**, and (b) after addition of Hg (II) solution ( $\lambda_{\text{ex}} = 310 \text{ nm}$ ;  $\lambda_{\text{probe}} = 357 \text{ nm}$ ).

**Table S10.** Lifetime decay profile of **1** after addition of HgCl<sub>2</sub> aqueous solution.

| $\lambda_{\text{excitation}}$ | $\lambda_{\text{detection}}$ | $\alpha_1$ | $\tau_1 \text{ (ns)}$ | $\alpha_2$ | $\tau_2 \text{ (ns)}$ | $\alpha_3$ | $\tau_3 \text{ (ns)}$ | $\chi^2$ |
|-------------------------------|------------------------------|------------|-----------------------|------------|-----------------------|------------|-----------------------|----------|
| 310 nm                        | 357 nm                       | 0.06       | 0.3                   | 0.07       | 5.563                 | 0.87       | 22.216                | 0.97     |

## X. References

- S1 L. Li, Q. Chen, Z. Niu, X. Zhou, T. Yang and W. Huang, *J. Mater. Chem. C*, 2016, **4**, 1900–1905.
- S2 K. Yi and L. Zhang, *J. Hazard. Mater.*, 2020, **389**, 122141.
- S3 Z. Li, Z. Zhan and M. Hu, *CrystEngComm*, 2020, **22**, 6727–6737.
- S4 G. Ji, J. Liu, X. Gao, W. Sun, J. Wang, S. Zhao and Z. Liu, *J. Mater. Chem. A*, 2017, **5**, 10200–10205.
- S5 X. An, Q. Tan, S. Pan, H. Liu and X. Hu, *Spectrochim. Acta Part A Mol. Biomol. Spectrosc.*, 2021, **247**, 119073.
- S6 L. H. Chen, X. Bin Cai, Q. Li, B. Bin Guan, T. H. Liu, D. Li, Z. Q. Wu and W. Zhu, *J. Solid State Chem.*, 2021, **302**, 122416.
- S7 J.-X. Hou, J.-P. Gao, J. Liu, X. Jing, L.-J. Li and J.-L. Du, *Dye. Pigment.*, 2019, **160**, 159–164.
- S8 S. Xu, L. Zhan, C. Hong, X. Chen, X. Chen and M. Oyama, *Sensors Actuators B Chem.*, 2020, **308**, 127733.
- S9 D.-C. Hu, X.-R. Da, J.-J. Tan, X.-F. Guo, H. Feng and J.-C. Liu, *Polyhedron*, 2020, **186**, 114613.
- S10 Q. Li, B.-B. Guan, W. Zhu, T.-H. Liu, L.-H. Chen, Y. Wang and D.-X. Xue, *J. Solid State Chem.*, 2020, **291**, 121672.
- S11 Rigaku Oxford Diffraction. CrysAlisPro Software System, version 1.171.39.30d, Rigaku Corporation: Oxford, UK, 2018.
- S12 G. M. Sheldrick, Crystal Structure Refinement with SHELXL. *Acta Crystallogr., Sect. C: Struct. Chem.* 2015, **71**, 3–8.
- S13 O. V. Dolomanov, L. J. Bourhis, R. J. Gildea, Howard, J. A. Gildea, H. Puschmann, *J. Appl. Crystallogr.* 2009, **42**, 339–341.
- S14 A. Nath, S. Chawla, A. K. De, P. Deria, S. Mandal, *Chem. Eur. J.* 2022, accepted.
- S15 I. B. Berlman, "Handbook of Fluorescence Spectra of Aromatic Molecules," *Academic Press* 1971, New York, N. Y.
- S16 W. Liu, Y. Wang, Z. Bai, Y. Li, Y. Wang, L. Chen, L. Xu, J. Diwu, Z. Chai, S. Wang, *ACS Appl. Mater. Interfaces* 2017, **9**, 16448–16457.
- S17 J-D. Chaia, M. Head-Gordon, *Phys. Chem. Chem. Phys.* 2008, **10**, 6615-6620.
- S18 P. J. Hay, W. R. Wadt, *J. Chem. Phys.* 1985, **82**, 270.
- S19 P. J. Hay, W. R. Wadt, *J. Chem. Phys.* 1985, **82**, 299.
- S20 M.J. Frisch, G.W. Trucks, H.B. Schlegel, G.E. Scuseria, M.A. Robb, J.R. Cheeseman, G. Scalmani, V. Barone, G. A. Petersson, H. Nakatsuji, X. Li, M. Caricato, A. V. Marenich, J. Bloino, B. G. Janesko, R. Gomperts, B. Mennucci, H. P. Hratchian, J. V. Ortiz, A. F. Izmaylov, J. L. Sonnenberg, D. Williams-Young, F. Ding, F. Lipparini, F. Egidi, J. Goings, B. Peng, A. Petrone, T. Henderson, D. Ranasinghe, V. G. Zakrzewski, J. Gao, N. Rega, G. Zheng, W. Liang, M. Hada, M. Ehara, K. Toyota, R. Fukuda, J. Hasegawa, M. Ishida, T. Nakajima, Y. Honda, O. Kitao, H. Nakai, T. Vreven, K. Throssell, J.A. Jr. Montgomery, J. E. Peralta, F. Ogliaro, M. J. Bearpark, J. J. Heyd, E. N. Brothers, K. N. Kudin, V. N. Staroverov, T. A. Keith, R. Kobayashi, J. Normand, K. Raghavachari, A. P. Rendell, J. C. Burant, S. S. Iyengar, J. Tomasi, M. Cossi, J. M. Millam, M, Klene, C. Adamo, R. Cammi, J. W. Ochterski, R. L. Martin, K. Morokuma, O. Farkas, J. B. Foresman, D. J. Fox, Gaussian 16 Revision C.01, Gaussian Inc., Wallingford CT 2016.
- S21 D. D. M. Prabakaran, K. Sadaiyandi, M. Mahendran, S. Sagadevan, *Appl. Phys.* 2017, A **123**, 264.
